# Supplementary material for: Brain Functional Connectivity in Low- and High-Grade Gliomas: Differences in Network Dynamics Associated with Tumor Grade and Location
Source: MDPI journal article supplement (doi:10.3390/cancers14143327), 2022-07-08
Supplement: s1 [file s1]

# SUPPLEMENTARY MATERIAL

**Figure S1.** Summary of the study population and workflow

- Study population: **30** low-grade (LGG), **30** high-grade (HGG) **left-hemispheric glioma** patients and **20** healthy controls (HC)

30 LGG  
mean age 40 years,  
21 males

30 HGG  
mean age 61 years,  
22 males

20 HC  
mean age 48 years,  
12 males

- Since the tumors were left-hemispheric, we investigated patients' language performance as example of left-lateralized function through the Boston Naming Test, to identify possible clinical correlates of network changes
- We applied graph-theory on resting-state fMRI data in three separate analyses: 1) whole-brain functional networks; 2) hemispheric networks; 3) lobar networks in sub-groups of patients divided by tumor location

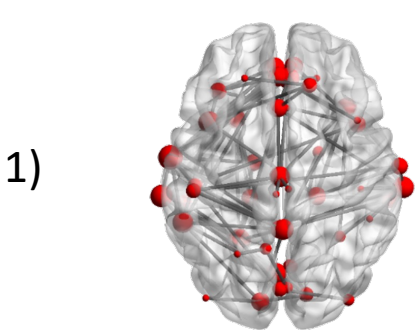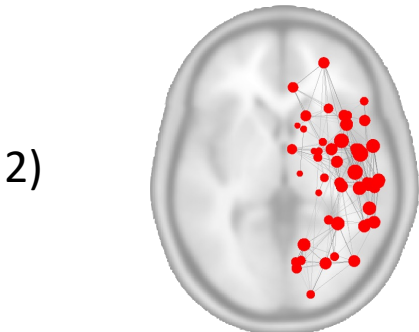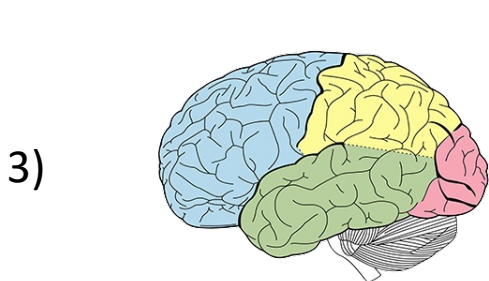

- Seven graph-theoretical metrics were calculated in every functional network (FDR corrected,  $p < 0.05$ ). Two-tailed Student t-test or Mann-Whitney U-test ( $p < 0.05$ ) were used to compare the results in **LGG vs. HC** and **HGG vs. HC**.

**Figure S2.** Distribution of tumor size and patients' age in our study population of HGG and LGG

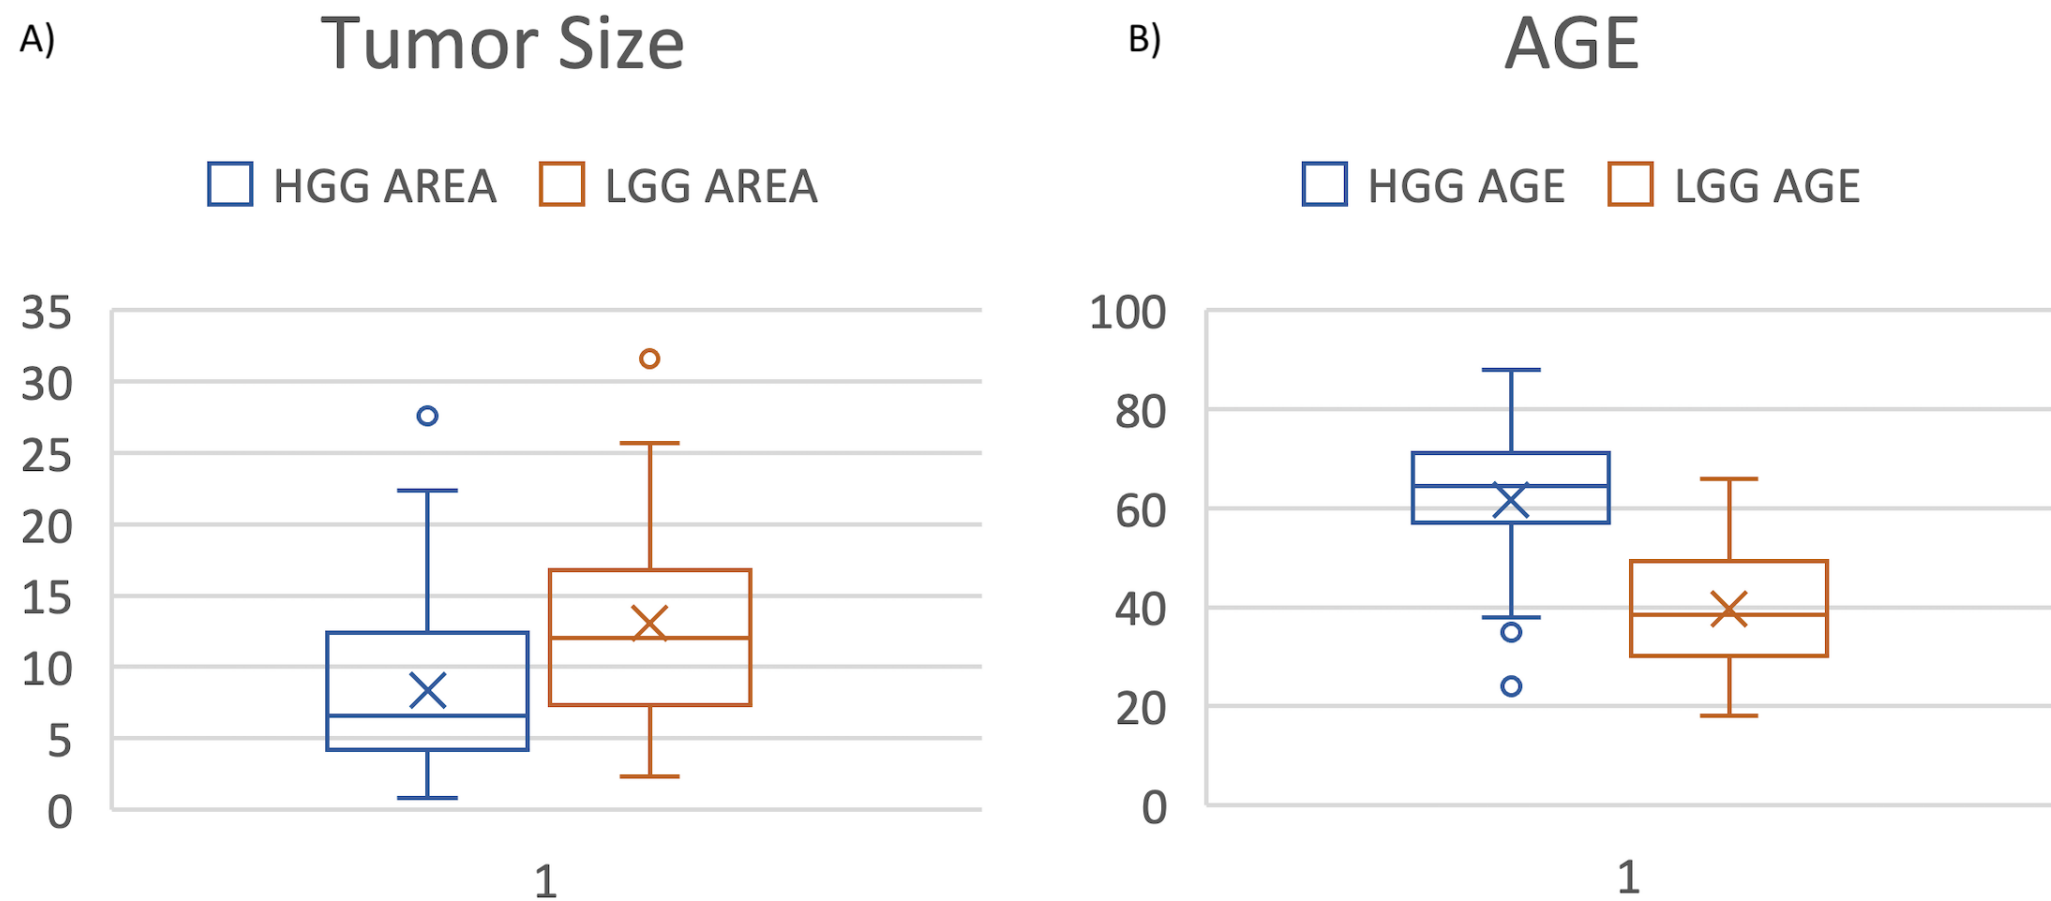

Box-plots representing the distribution of tumor size (A) and patients' age (B) in HGG (blue) and LGG (orange). Tumor size is expressed in cm<sup>2</sup>, patients' age is expressed in years

**Figure S3.** Whole-brain connectivity diagrams of left superior frontal gyrus

Higher p  Lower p

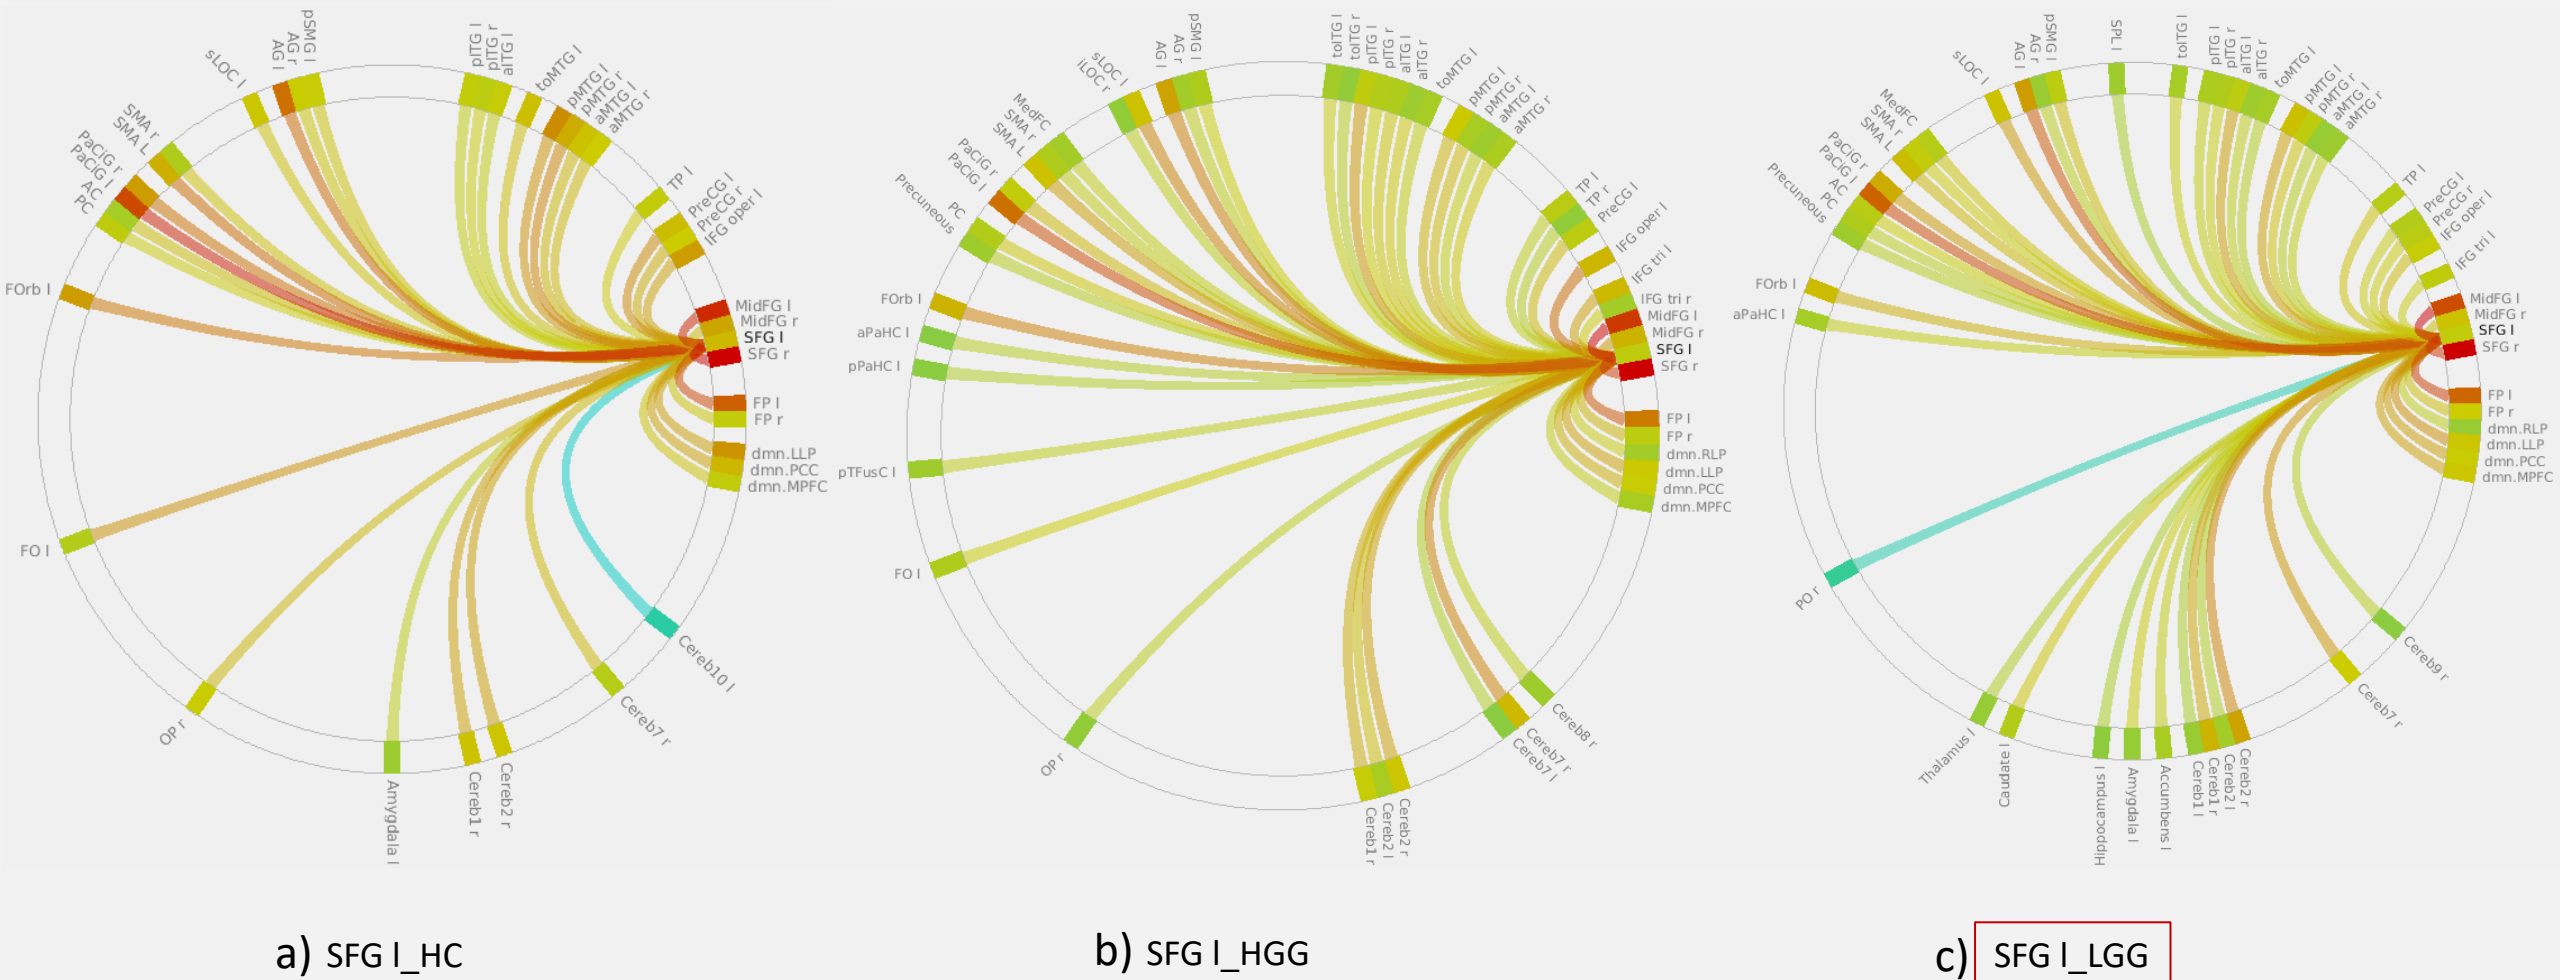

Whole-brain connectivity diagrams generated by seeding the left superior frontal gyrus (SFG I) in healthy controls (HC), left-hemispheric high-grade gliomas (HGG) and left-hemispheric low-grade gliomas (LGG). The red square in diagram c) indicates that there was a significant difference in functional connectivity in this seed for LGG compared to HC. The color scale of the links represents their statistical significance (p-value FDR corrected, only links with  $p < 0.05$  are included). Regions of interest (ROI) in the diagrams are labeled as per the AAL atlas (available in CONN toolbox at <https://web.conn-toolbox.org>)

**Figure S4.** Whole-brain connectivity diagrams of the left middle frontal gyrus

Higher p  Lower p

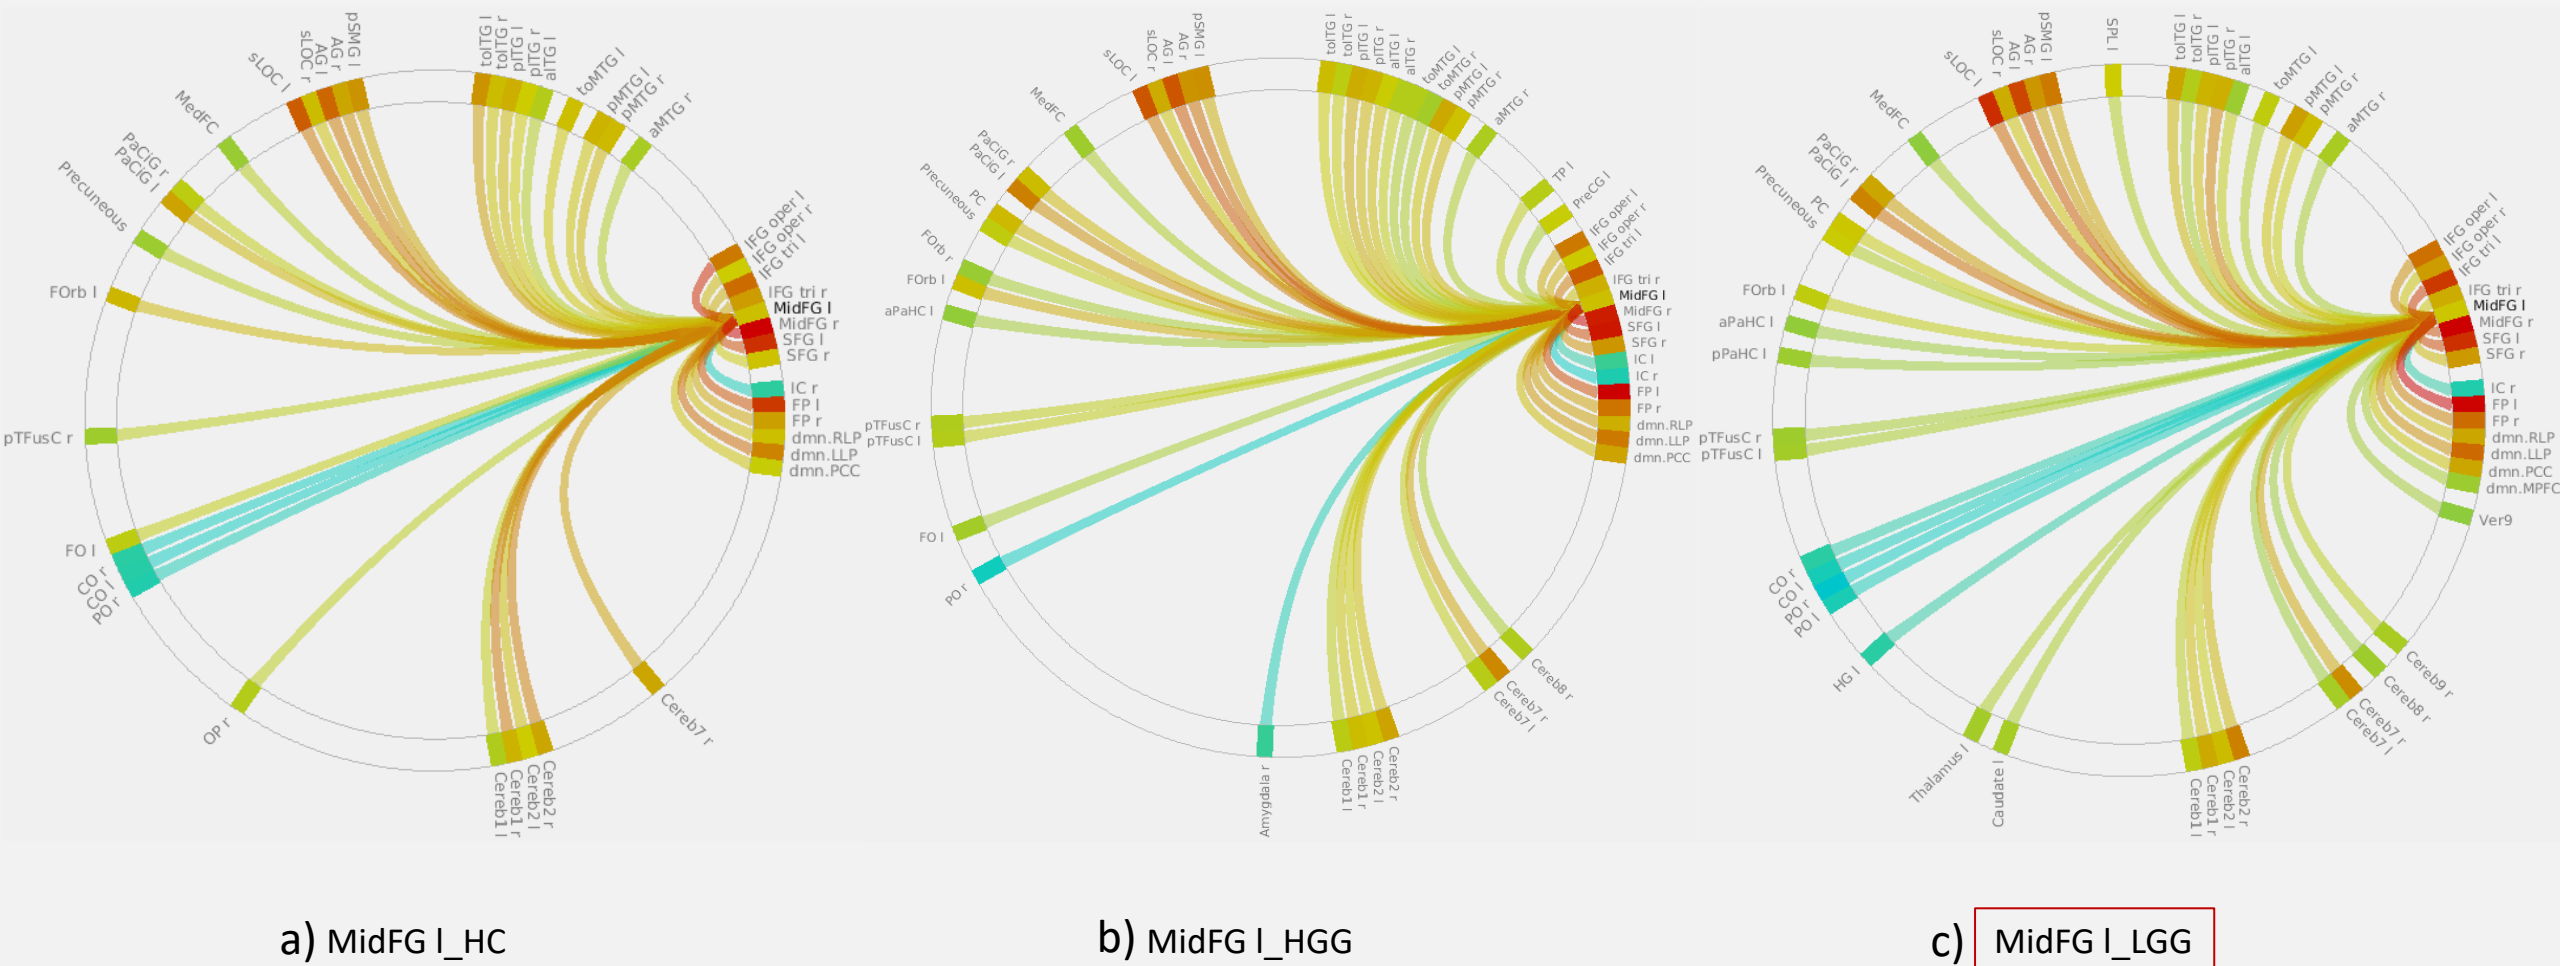

Whole-brain connectivity diagrams generated by seeding the left middle frontal gyrus (MidFG I) in healthy controls (HC), left-hemispheric high-grade gliomas (HGG) and left-hemispheric low-grade gliomas (LGG). The red square in diagram c) indicates that there was a significant difference in functional connectivity in this seed for LGG compared to HC. The color scale of the links represents their statistical significance (p-value FDR corrected, only links with p<0.05 are included). Regions of interest (ROI) in the diagrams are labeled as per the AAL atlas (available in CONN toolbox at <https://web.conn-toolbox.org>)

**Figure S5.** Whole-brain connectivity diagrams of the left inferior frontal gyrus, pars triangularis

Higher p  Lower p

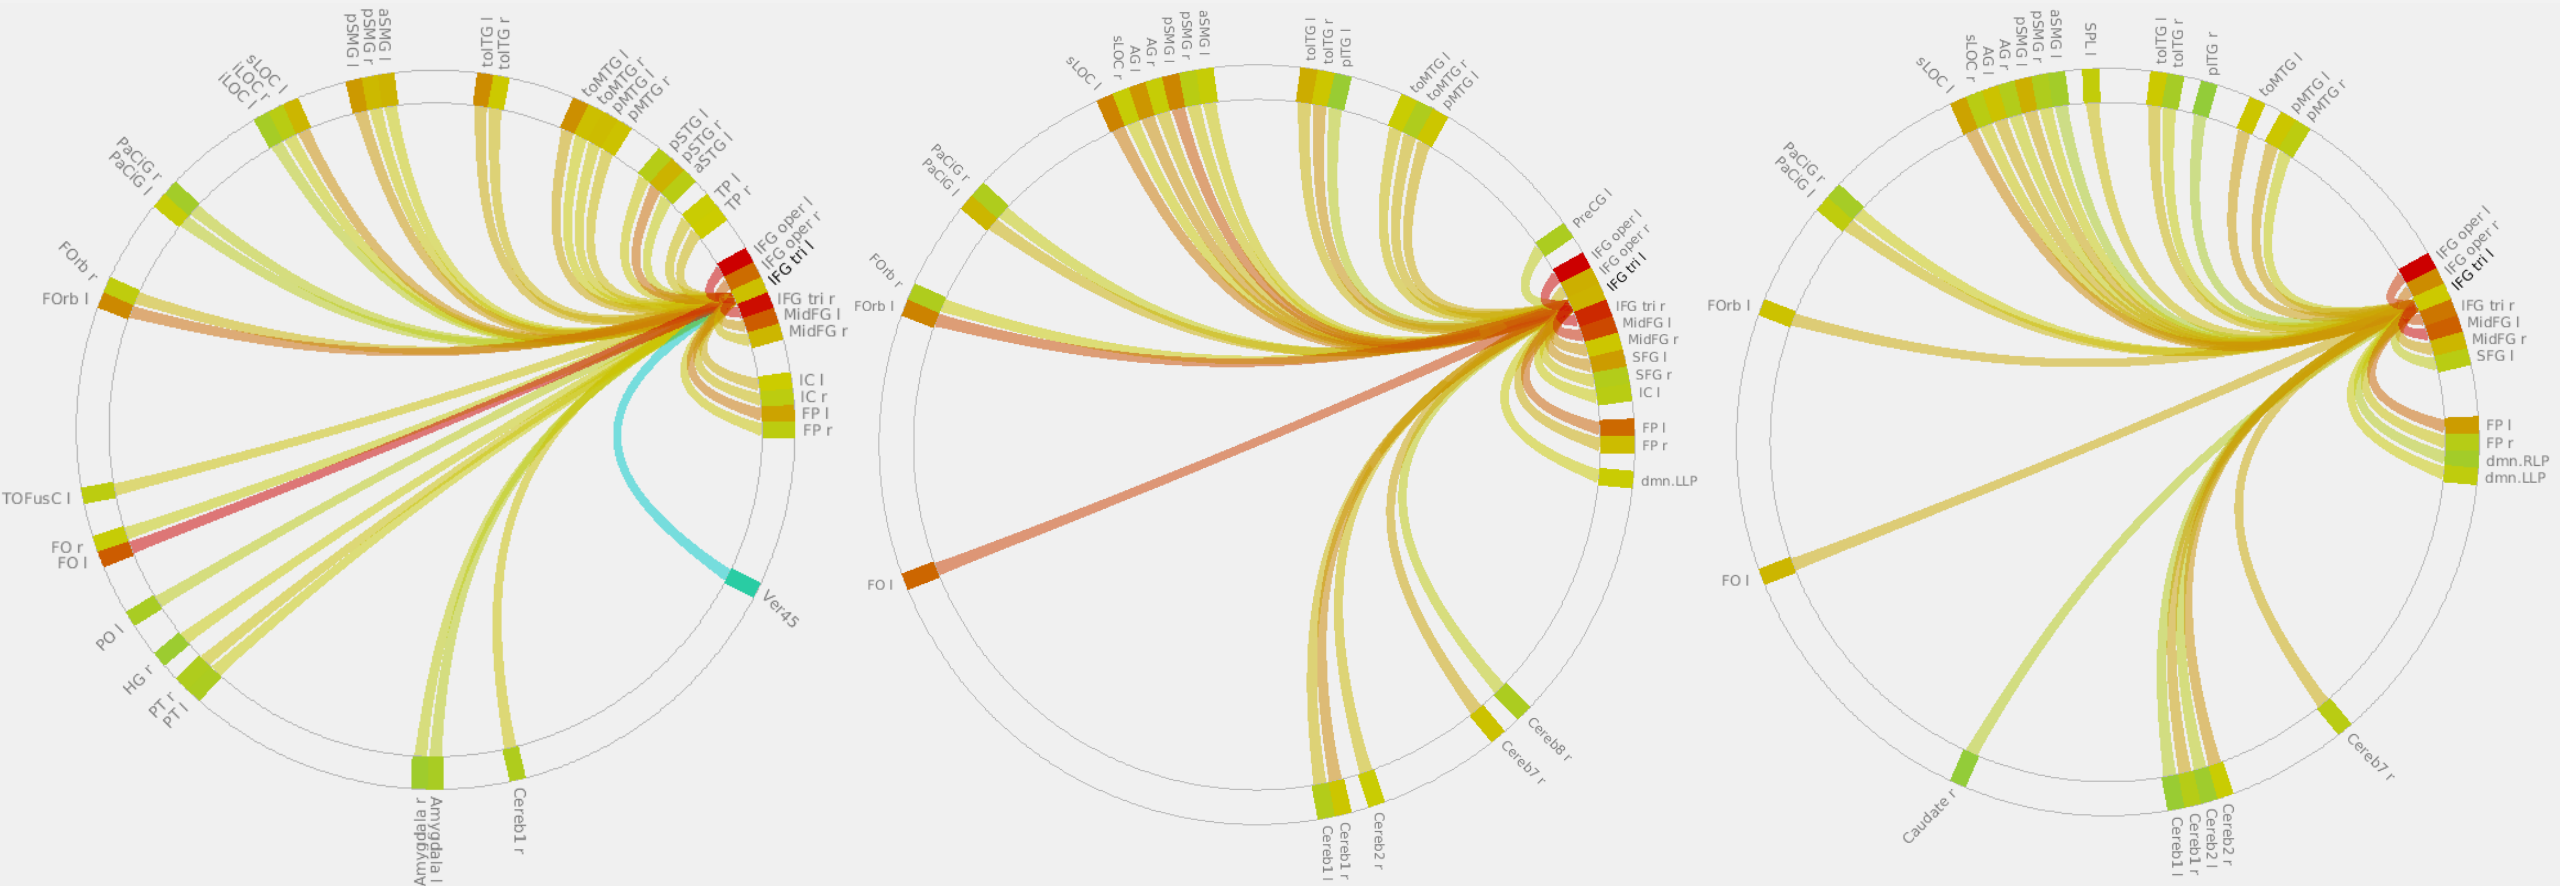

a) IFG tri I\_HC      b) IFG tri I\_HGG      c) IFG tri I\_LGG

Whole-brain connectivity diagrams generated by seeding the pars triangularis of the left inferior frontal gyrus (IFG tri I) in healthy controls (HC), left-hemispheric high-grade gliomas (HGG) and left-hemispheric low-grade gliomas (LGG). The red square in diagram b) indicates that there was a significant difference in functional connectivity in this seed for HGG compared to HC. The color scale of the links represents their statistical significance (p-value FDR corrected, only links with p<0.05 are included). Regions of interest (ROI) in the diagrams are labeled as per the AAL atlas (available in CONN toolbox at <https://web.conn-toolbox.org>)

**Figure S6.** Whole-brain connectivity diagrams of the right superior temporal gyrus, posterior division

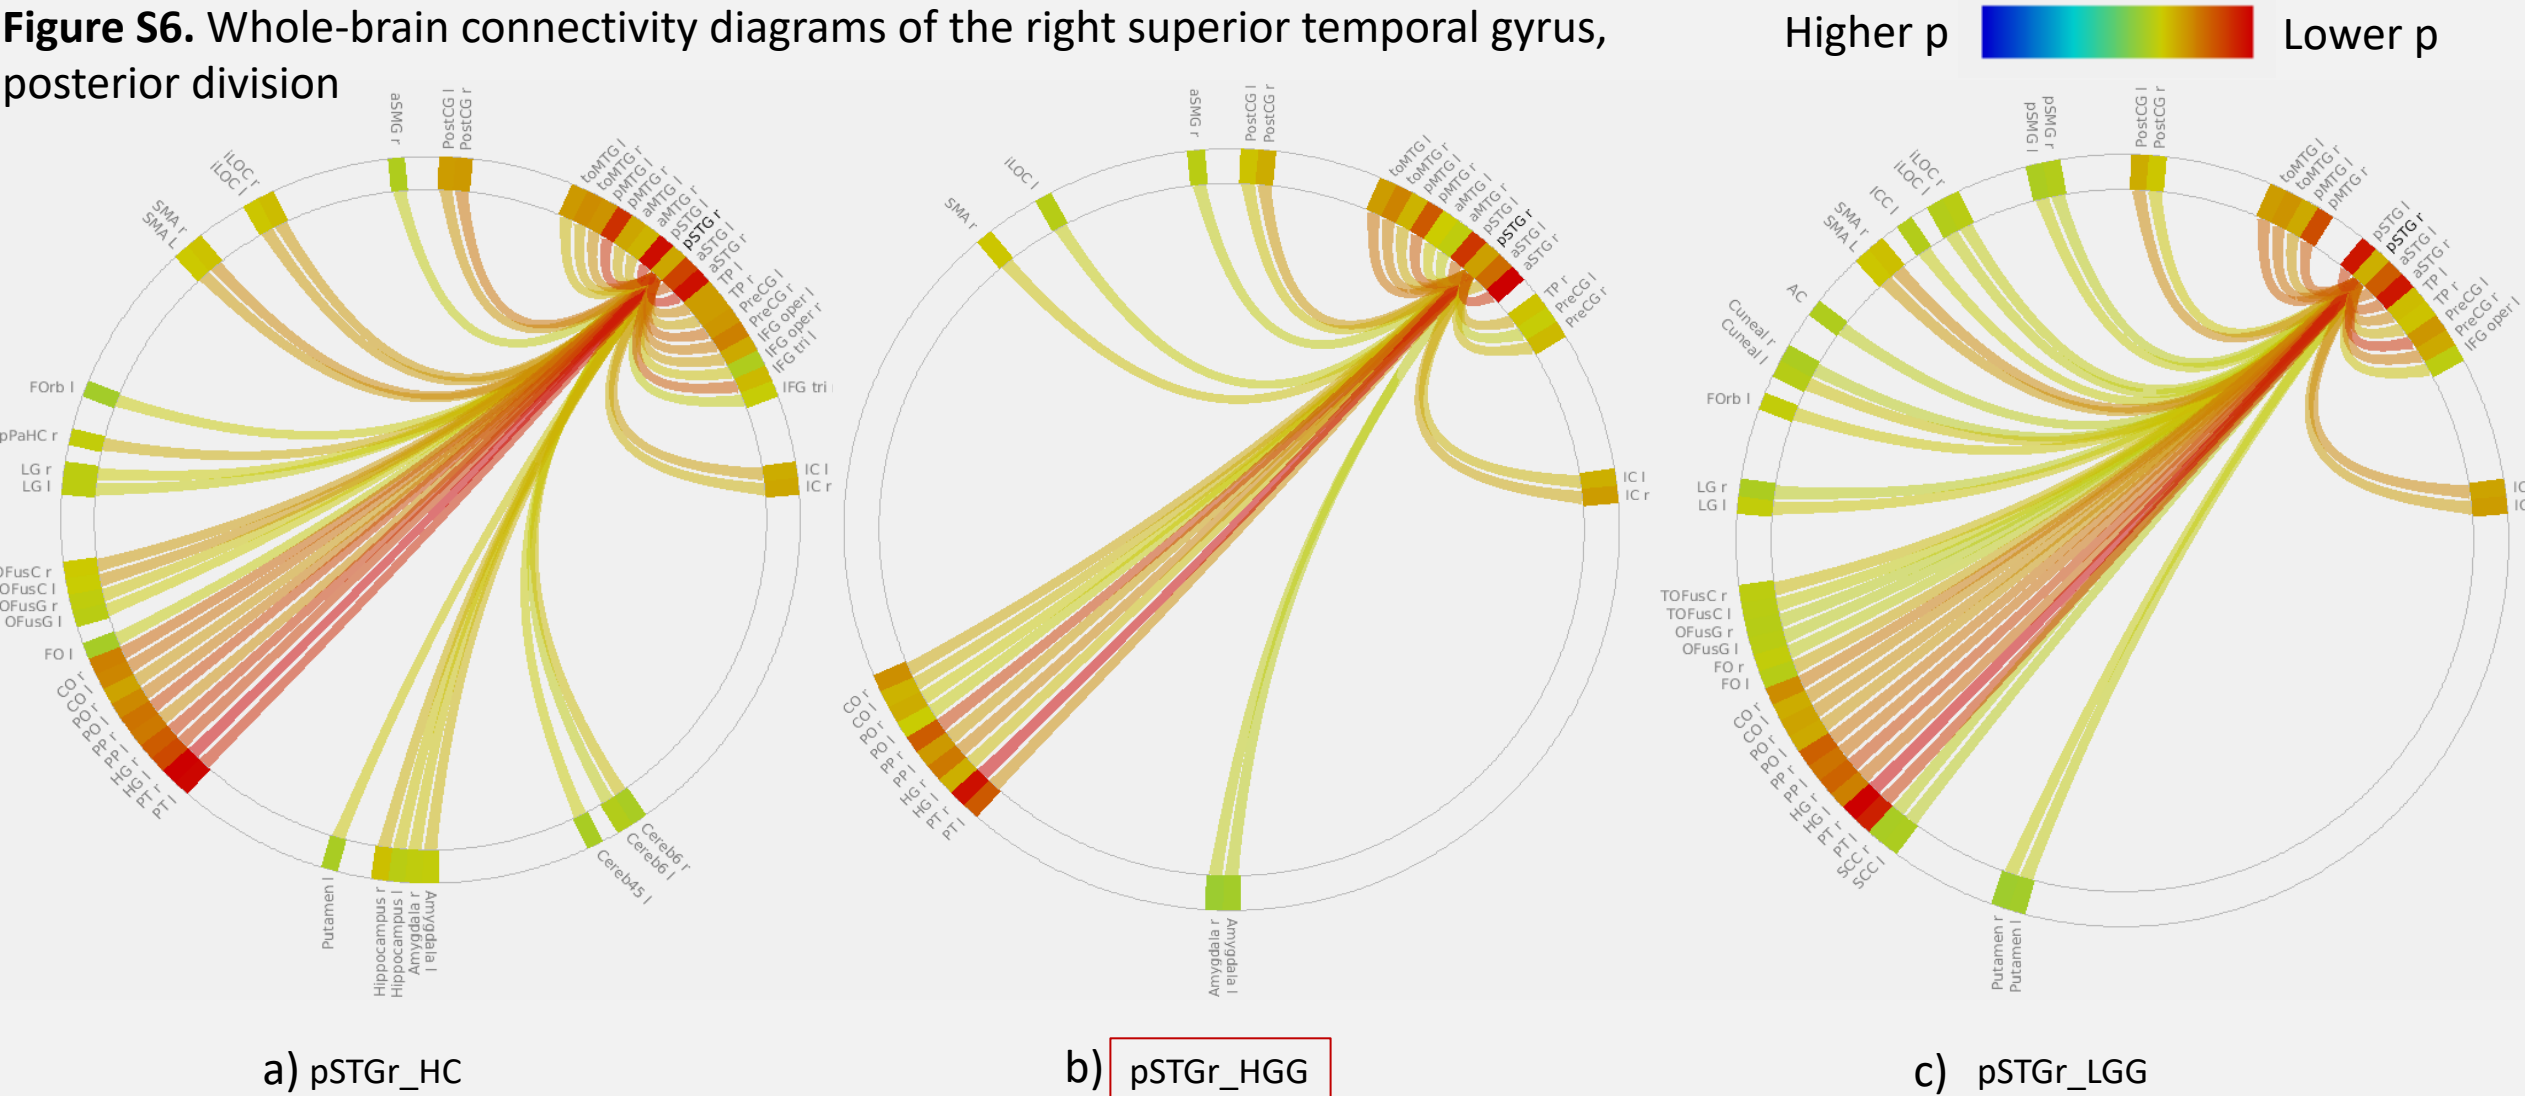

Whole-brain connectivity diagrams generated by seeding the posterior division of the right superior temporal gyrus (pSTGr) in healthy controls (HC), left-hemispheric high-grade gliomas (HGG) and left-hemispheric low-grade gliomas (LGG). The red square in diagram b) indicates that there was a significant difference in functional connectivity in this seed for HGG compared to HC. The color scale of the links represents their statistical significance (p-value FDR corrected, only links with  $p < 0.05$  are included). Regions of interest (ROI) in the diagrams are labeled as per the AAL atlas (available in CONN toolbox at <https://web.conn-toolbox.org>)



**Figure S7.** Whole-brain connectivity diagrams of the left superior temporal gyrus, posterior division

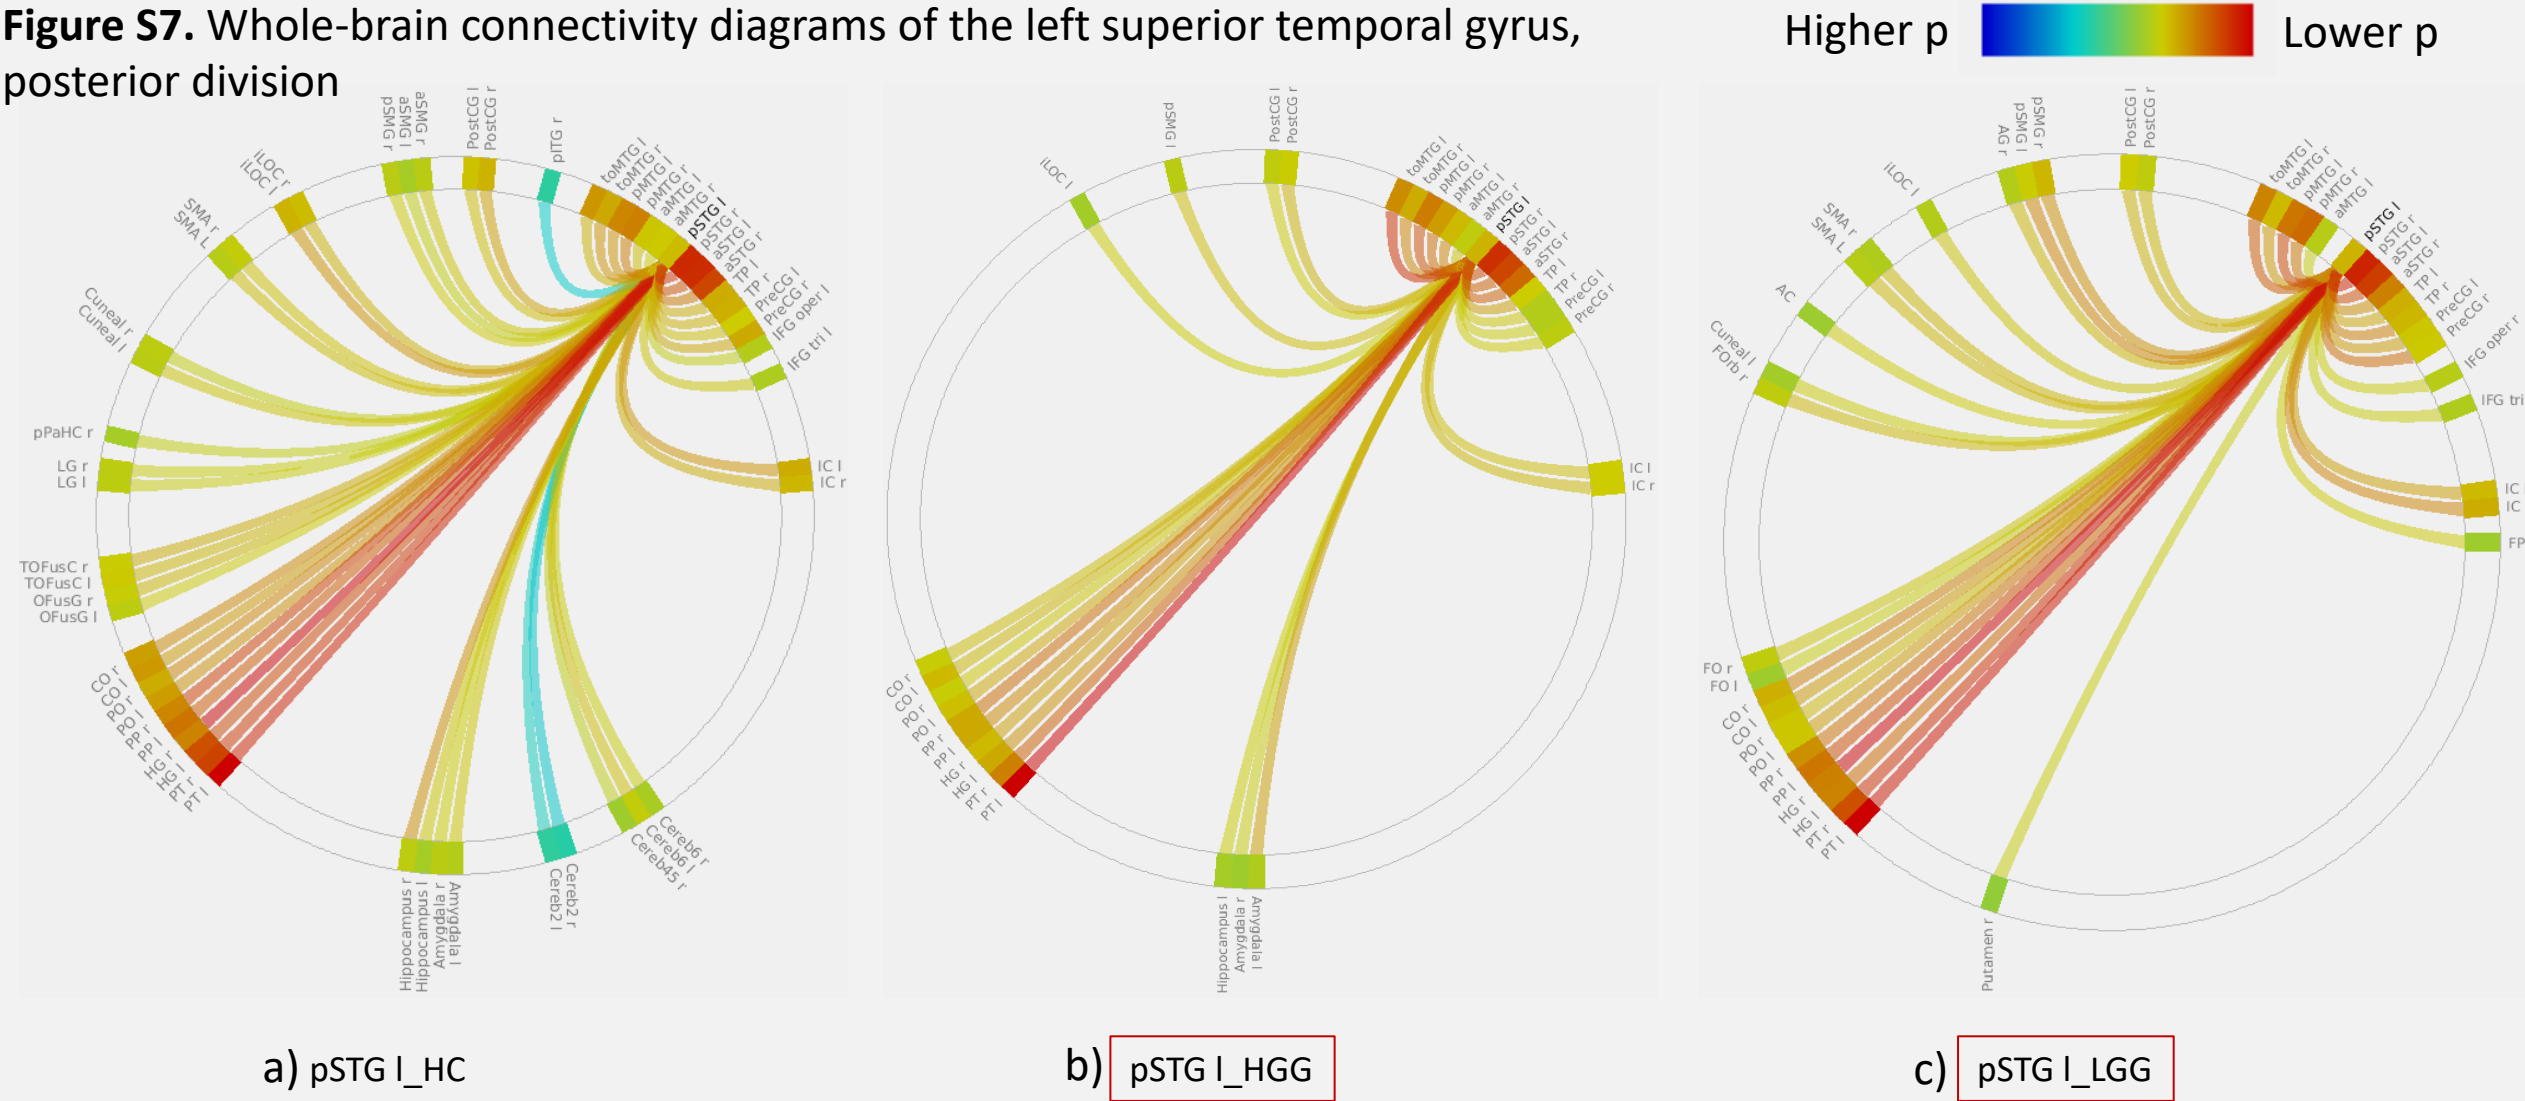

Whole-brain connectivity diagrams generated by seeding the posterior division of the left superior temporal gyrus (pSTG I) in healthy controls (HC), left-hemispheric high-grade gliomas (HGG) and left-hemispheric low-grade gliomas (LGG). The red square in diagram b) and c) indicates that there was a significant difference in functional connectivity in this seed for HGG and LGG compared to HC. The color scale of the links represents their statistical significance (p-value FDR corrected, only links with  $p < 0.05$  are included). Regions of interest (ROI) in the diagrams are labeled as per the AAL atlas (available in CONN toolbox at <https://web.conn-toolbox.org>)



**Figure S8.** Whole-brain connectivity diagrams of the left inferior temporal gyrus, anterior division

Higher p  Lower p

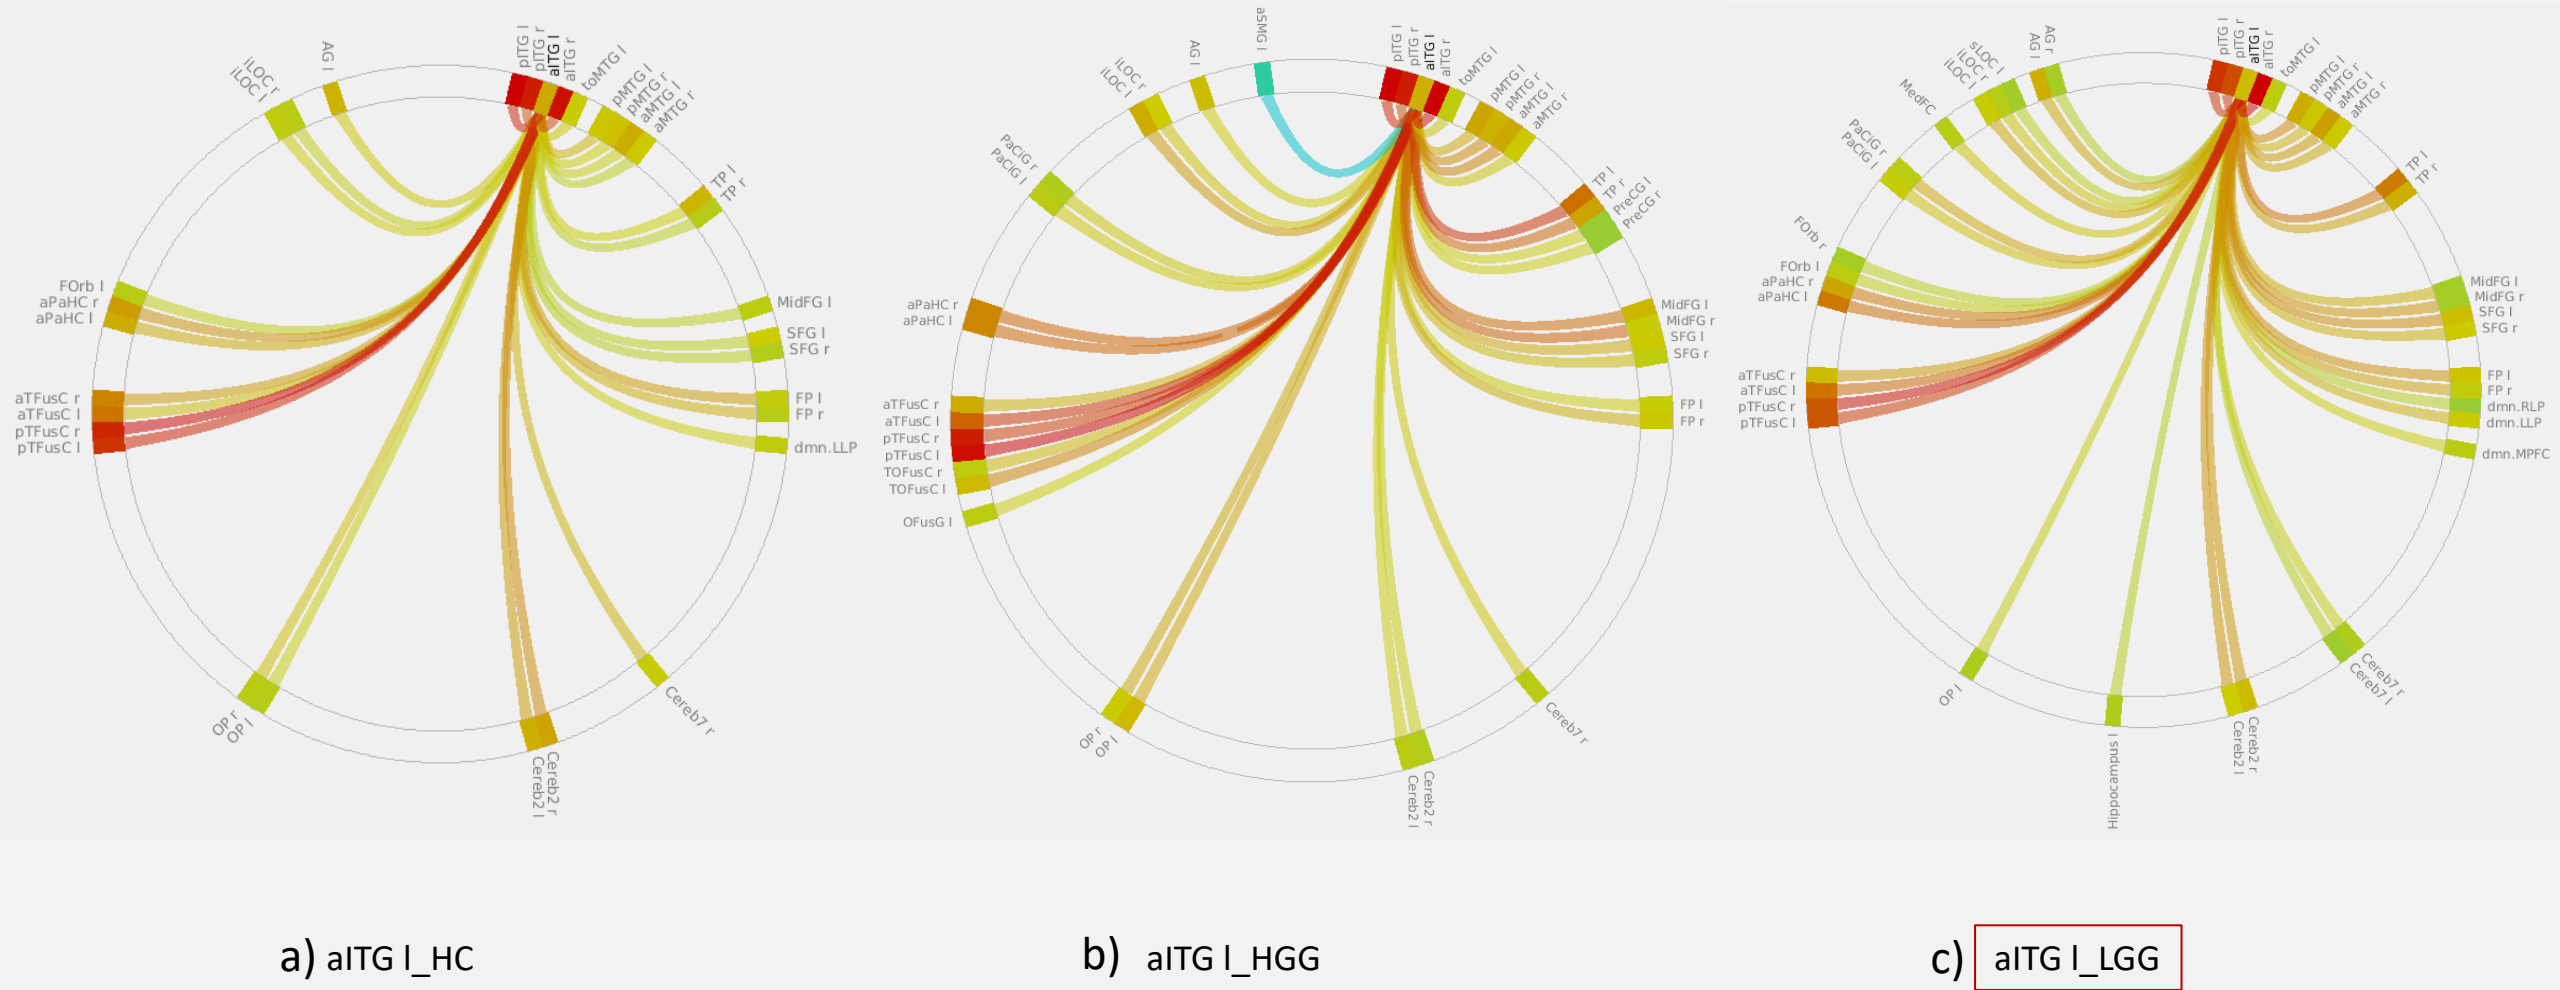

Whole-brain connectivity diagrams generated by seeding the anterior division of the left inferior temporal gyrus (aITG I) in healthy controls (HC), left-hemispheric high-grade gliomas (HGG) and left-hemispheric low-grade gliomas (LGG). The red square in diagram c) indicates that there was a significant difference in functional connectivity in this seed for LGG compared to HC. The color scale of the links represents their statistical significance (p-value FDR corrected, only links with  $p < 0.05$  are included). Regions of interest (ROI) in the diagrams are labeled as per the AAL atlas (available in CONN toolbox at <https://web.conn-toolbox.org>)

**Figure S9.** Whole-brain connectivity diagrams of the right inferior temporal gyrus, anterior division

Higher p  Lower p

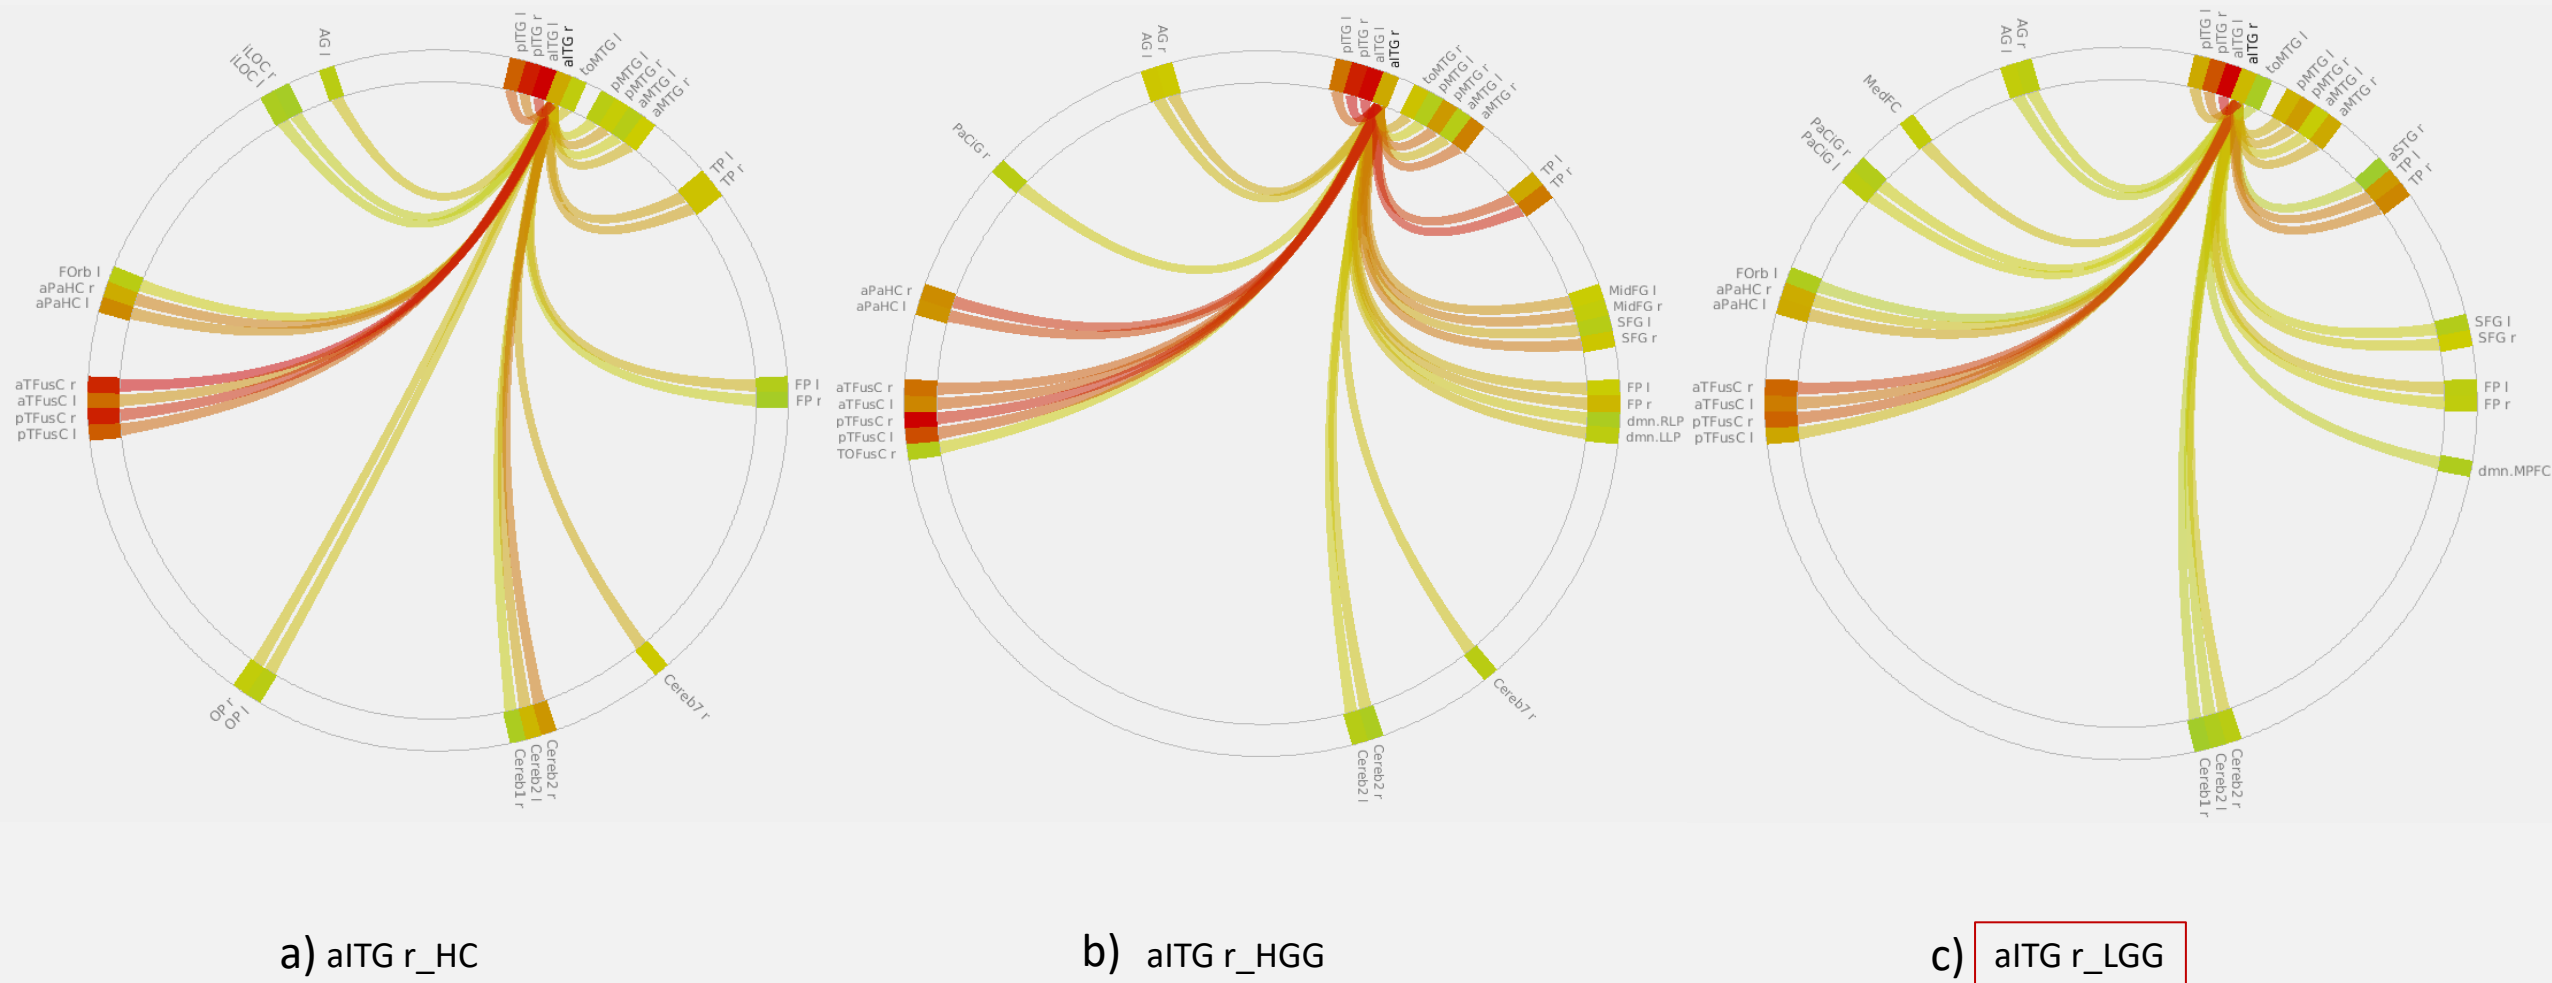

Whole-brain connectivity diagrams generated by seeding the anterior division of the right inferior temporal gyrus (aITG r) in healthy controls (HC), left-hemispheric high-grade gliomas (HGG) and left-hemispheric low-grade gliomas (LGG). The red square in diagram c) indicates that there was a significant difference in functional connectivity in this seed for LGG compared to HC. The color scale of the links represents their statistical significance (p-value FDR corrected, only links with  $p < 0.05$  are included). Regions of interest (ROI) in the diagrams are labeled as per the AAL atlas (available in CONN toolbox at <https://web.conn-toolbox.org>)

**Figure S10.** Whole-brain connectivity diagrams of the left middle temporal gyrus, anterior division

Higher p  Lower p

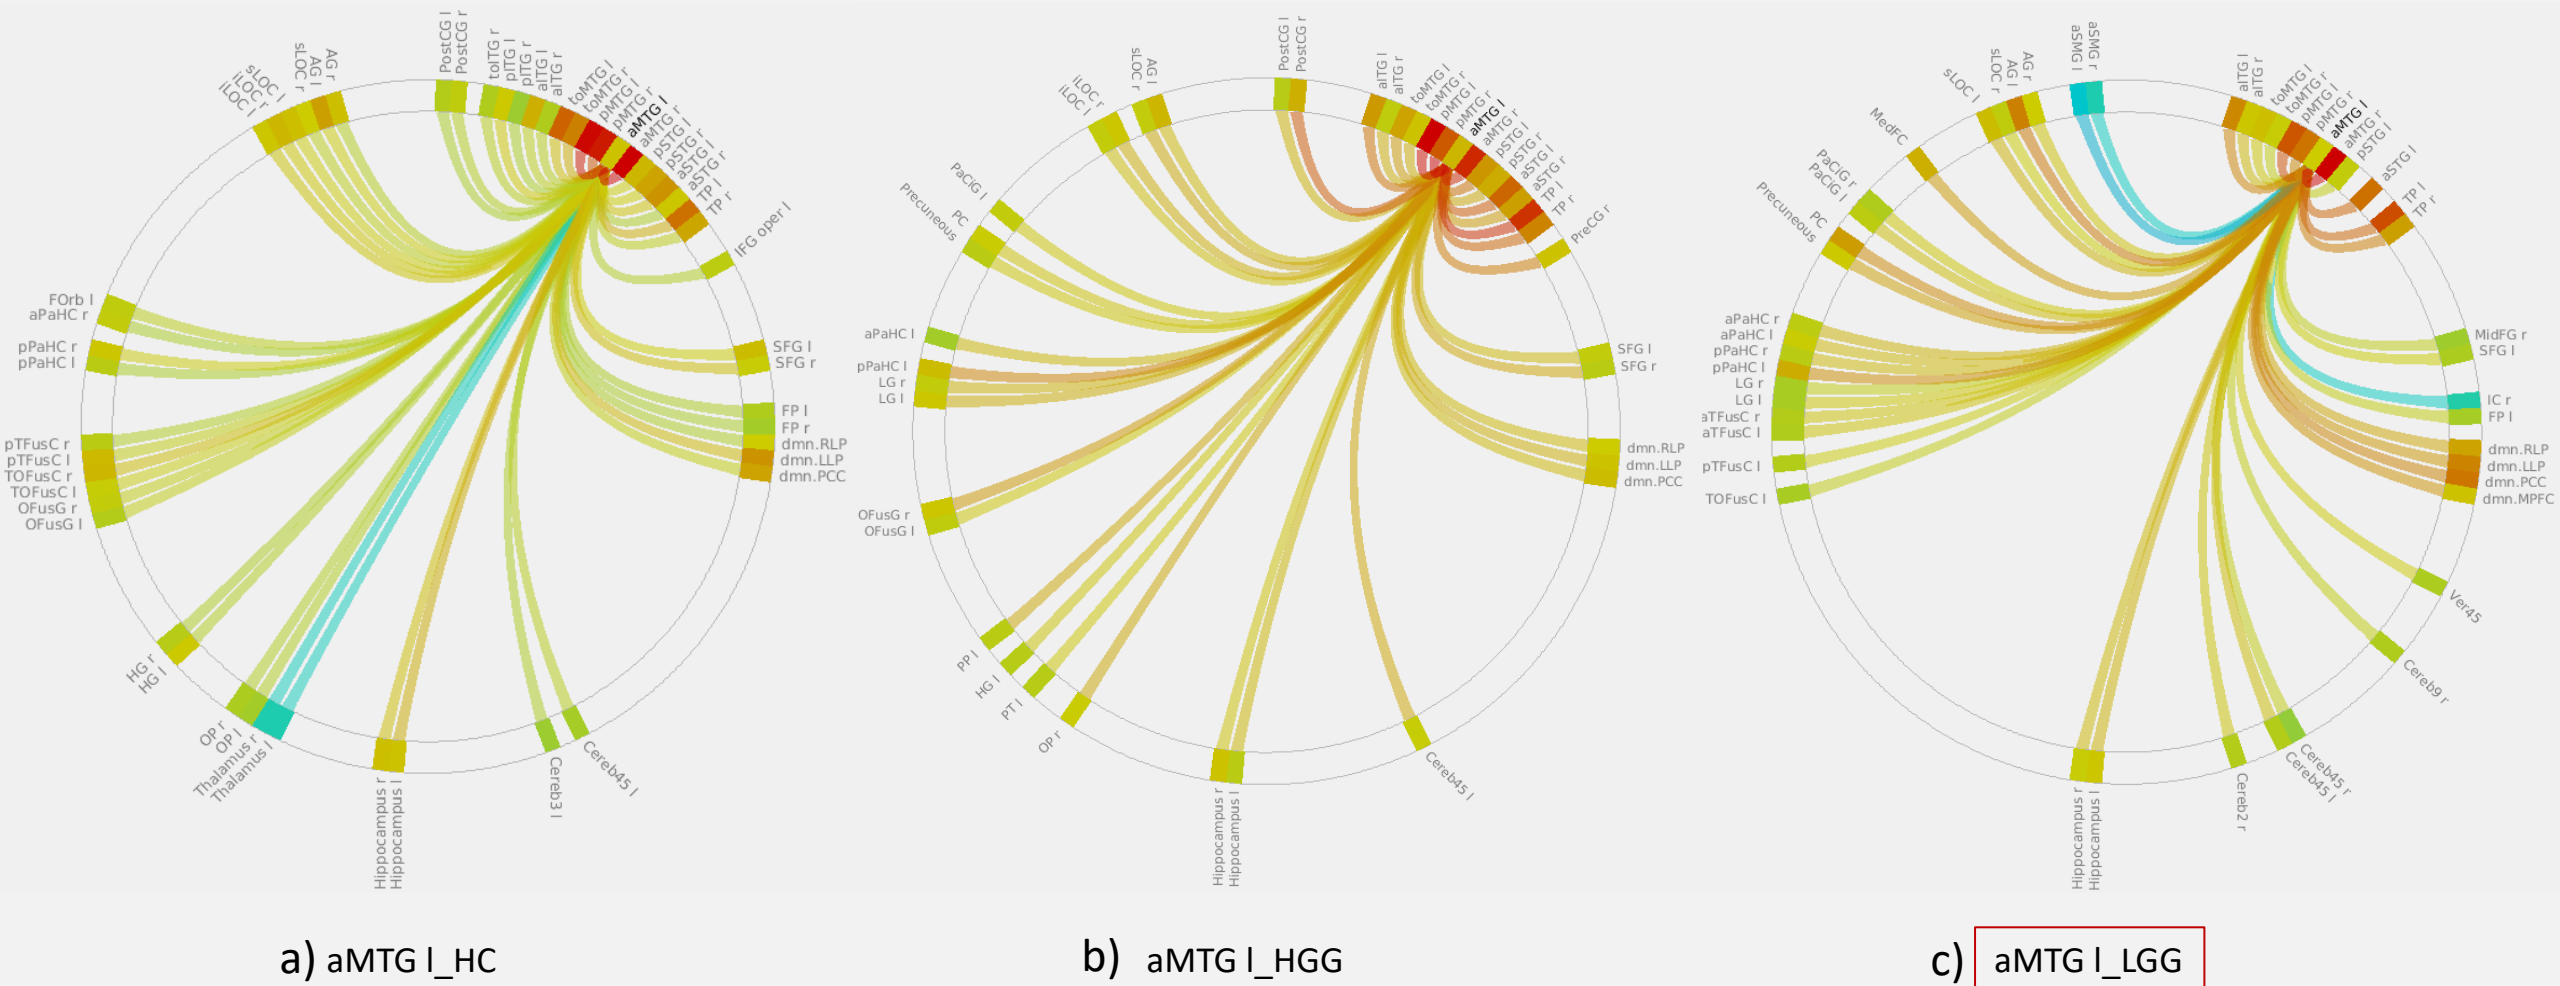

Whole-brain connectivity diagrams generated by seeding the anterior division of the left middle temporal gyrus (aMTG I) in healthy controls (HC), left-hemispheric high-grade gliomas (HGG) and left-hemispheric low-grade gliomas (LGG). The red square in diagram c) indicates that there was a significant difference in functional connectivity in this seed for LGG compared to HC. The color scale of the links represents their statistical significance (p-value FDR corrected, only links with  $p < 0.05$  are included). Regions of interest (ROI) in the diagrams are labeled as per the AAL atlas (available in CONN toolbox at <https://web.conn-toolbox.org>)

**Figure S11.** Whole-brain connectivity diagrams of the left superior temporal gyrus, anterior division

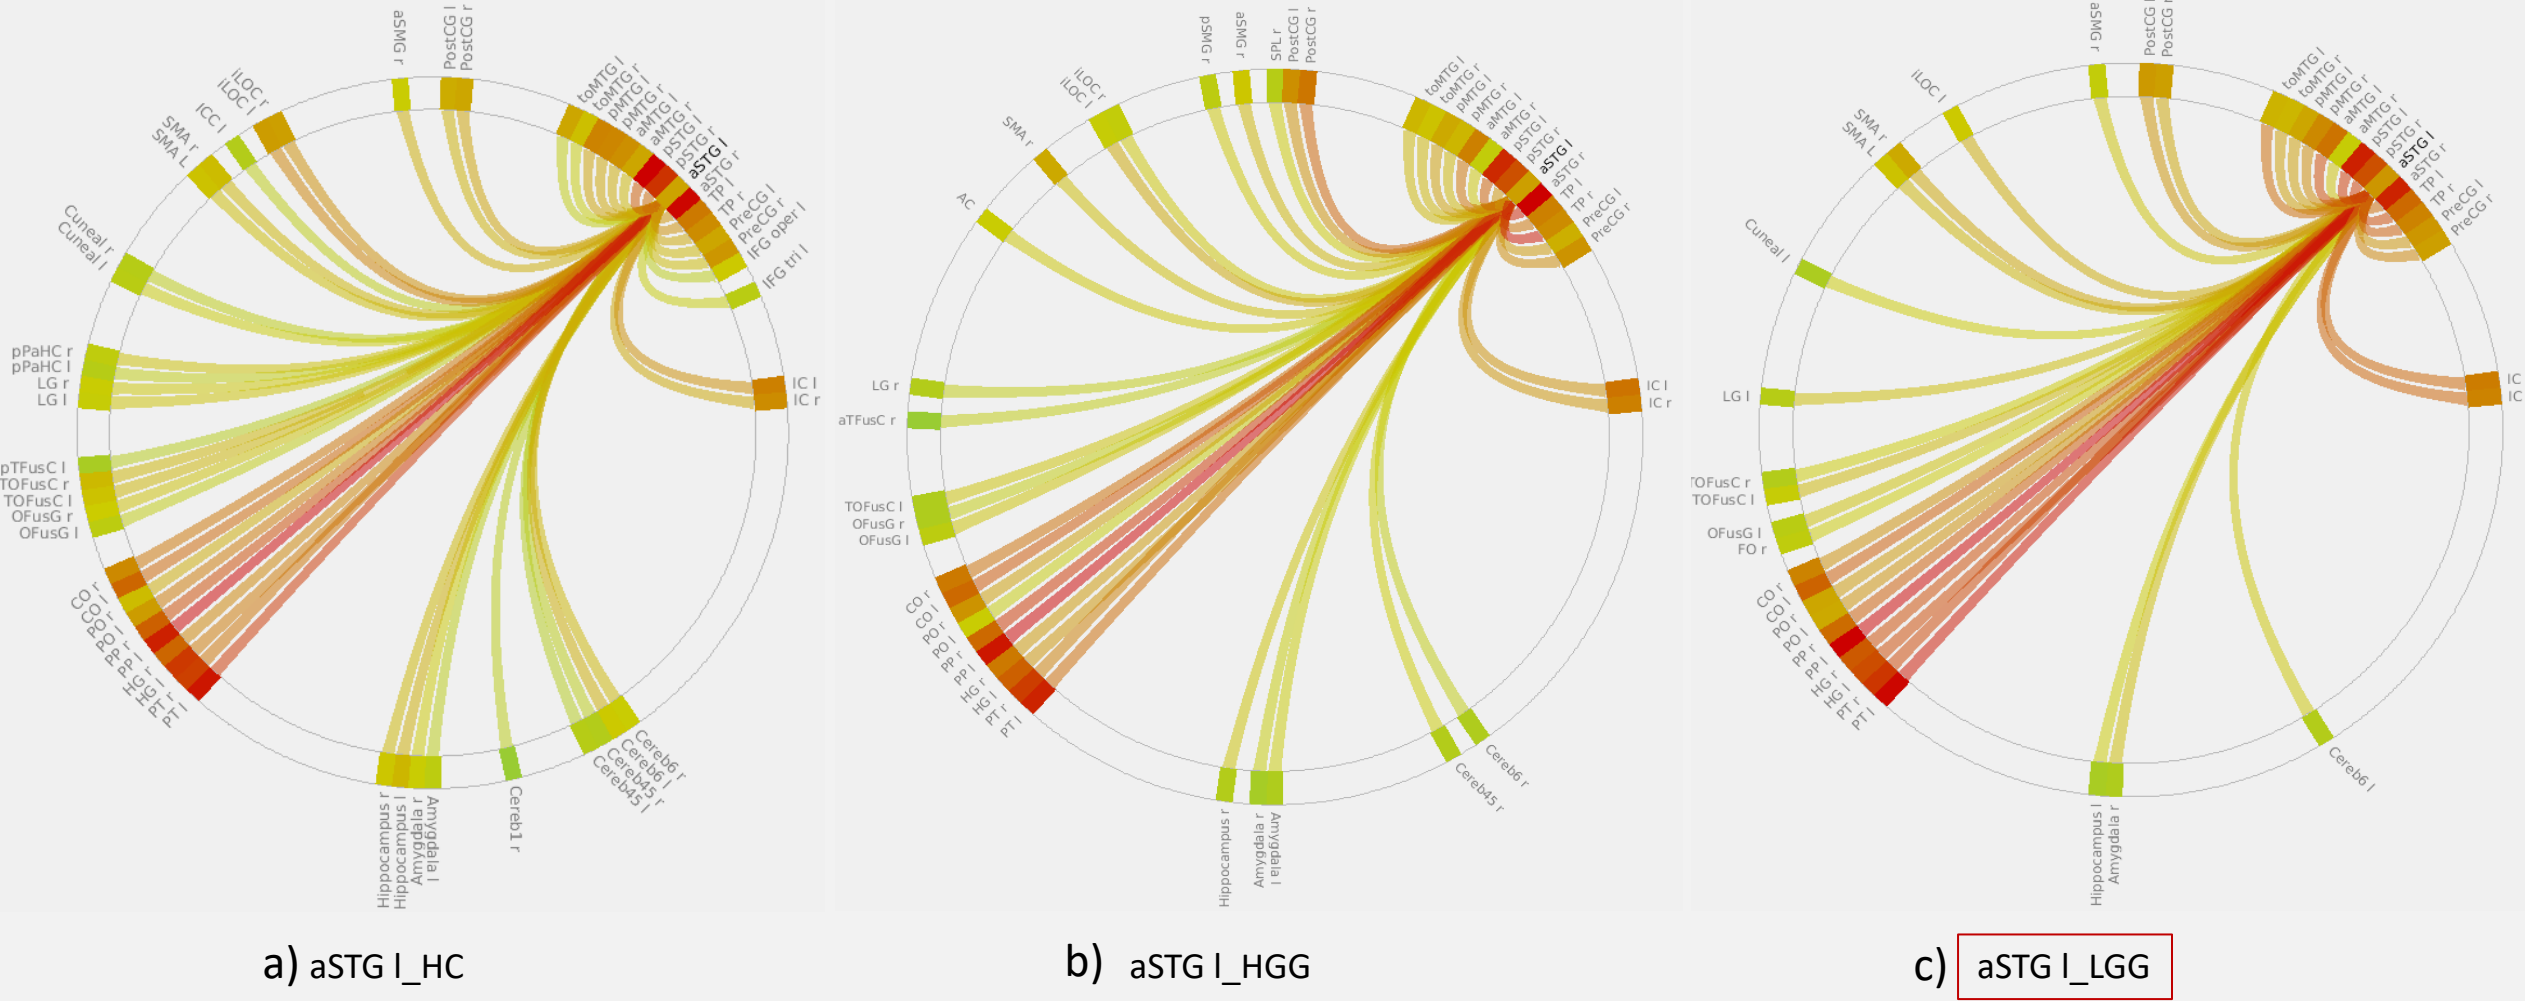

Whole-brain connectivity diagrams generated by seeding the anterior division of the left superior temporal gyrus (aSTG I) in healthy controls (HC), left-hemispheric high-grade gliomas (HGG) and left-hemispheric low-grade gliomas (LGG). The red square in diagram c) indicates that there was a significant difference in functional connectivity in this seed for LGG compared to HC. The color scale of the links represents their statistical significance (p-value FDR corrected, only links with  $p < 0.05$  are included). Regions of interest (ROI) in the diagrams are labeled as per the AAL atlas (available in CONN toolbox at <https://web.conn-toolbox.org>)

**Figure S12.** Whole-brain connectivity diagrams of the right middle temporal gyrus, temporo-occipital division

Higher p  Lower p

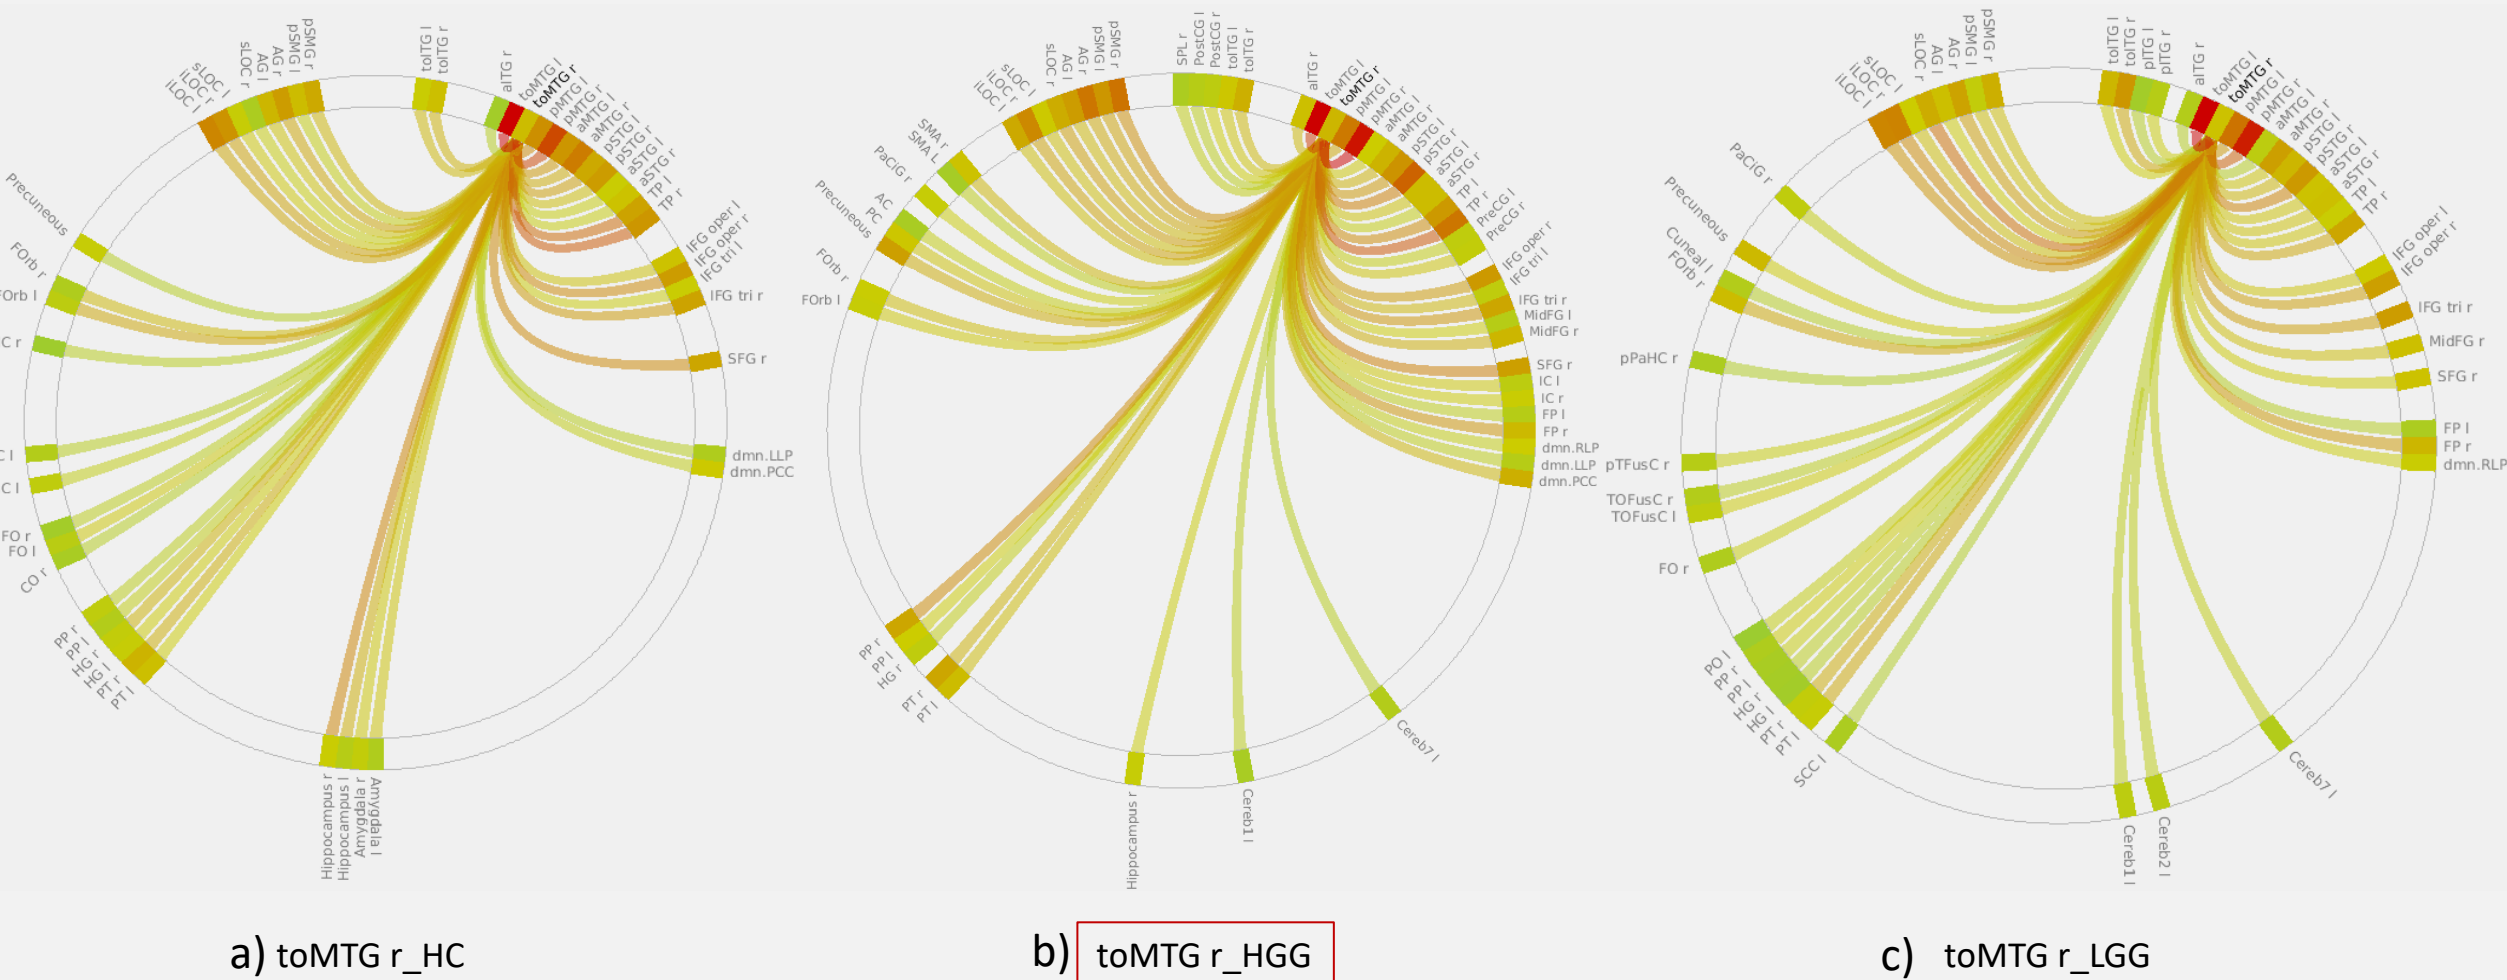

Whole-brain connectivity diagrams generated by seeding the temporo-occipital division of the right middle temporal gyrus (toMTG r) in healthy controls (HC), left-hemispheric high-grade gliomas (HGG) and left-hemispheric low-grade gliomas (LGG). The red square in diagram b) indicates that there was a significant difference in functional connectivity in this seed for HGG compared to HC. The color scale of the links represents their statistical significance (p-value FDR corrected, only links with  $p < 0.05$  are included). Regions of interest (ROI) in the diagrams are labeled as per the AAL atlas (available in CONN toolbox at <https://web.conn-toolbox.org>)



**Figure S13.** Whole-brain connectivity diagrams of the right middle temporal gyrus posterior division

Higher p  Lower p

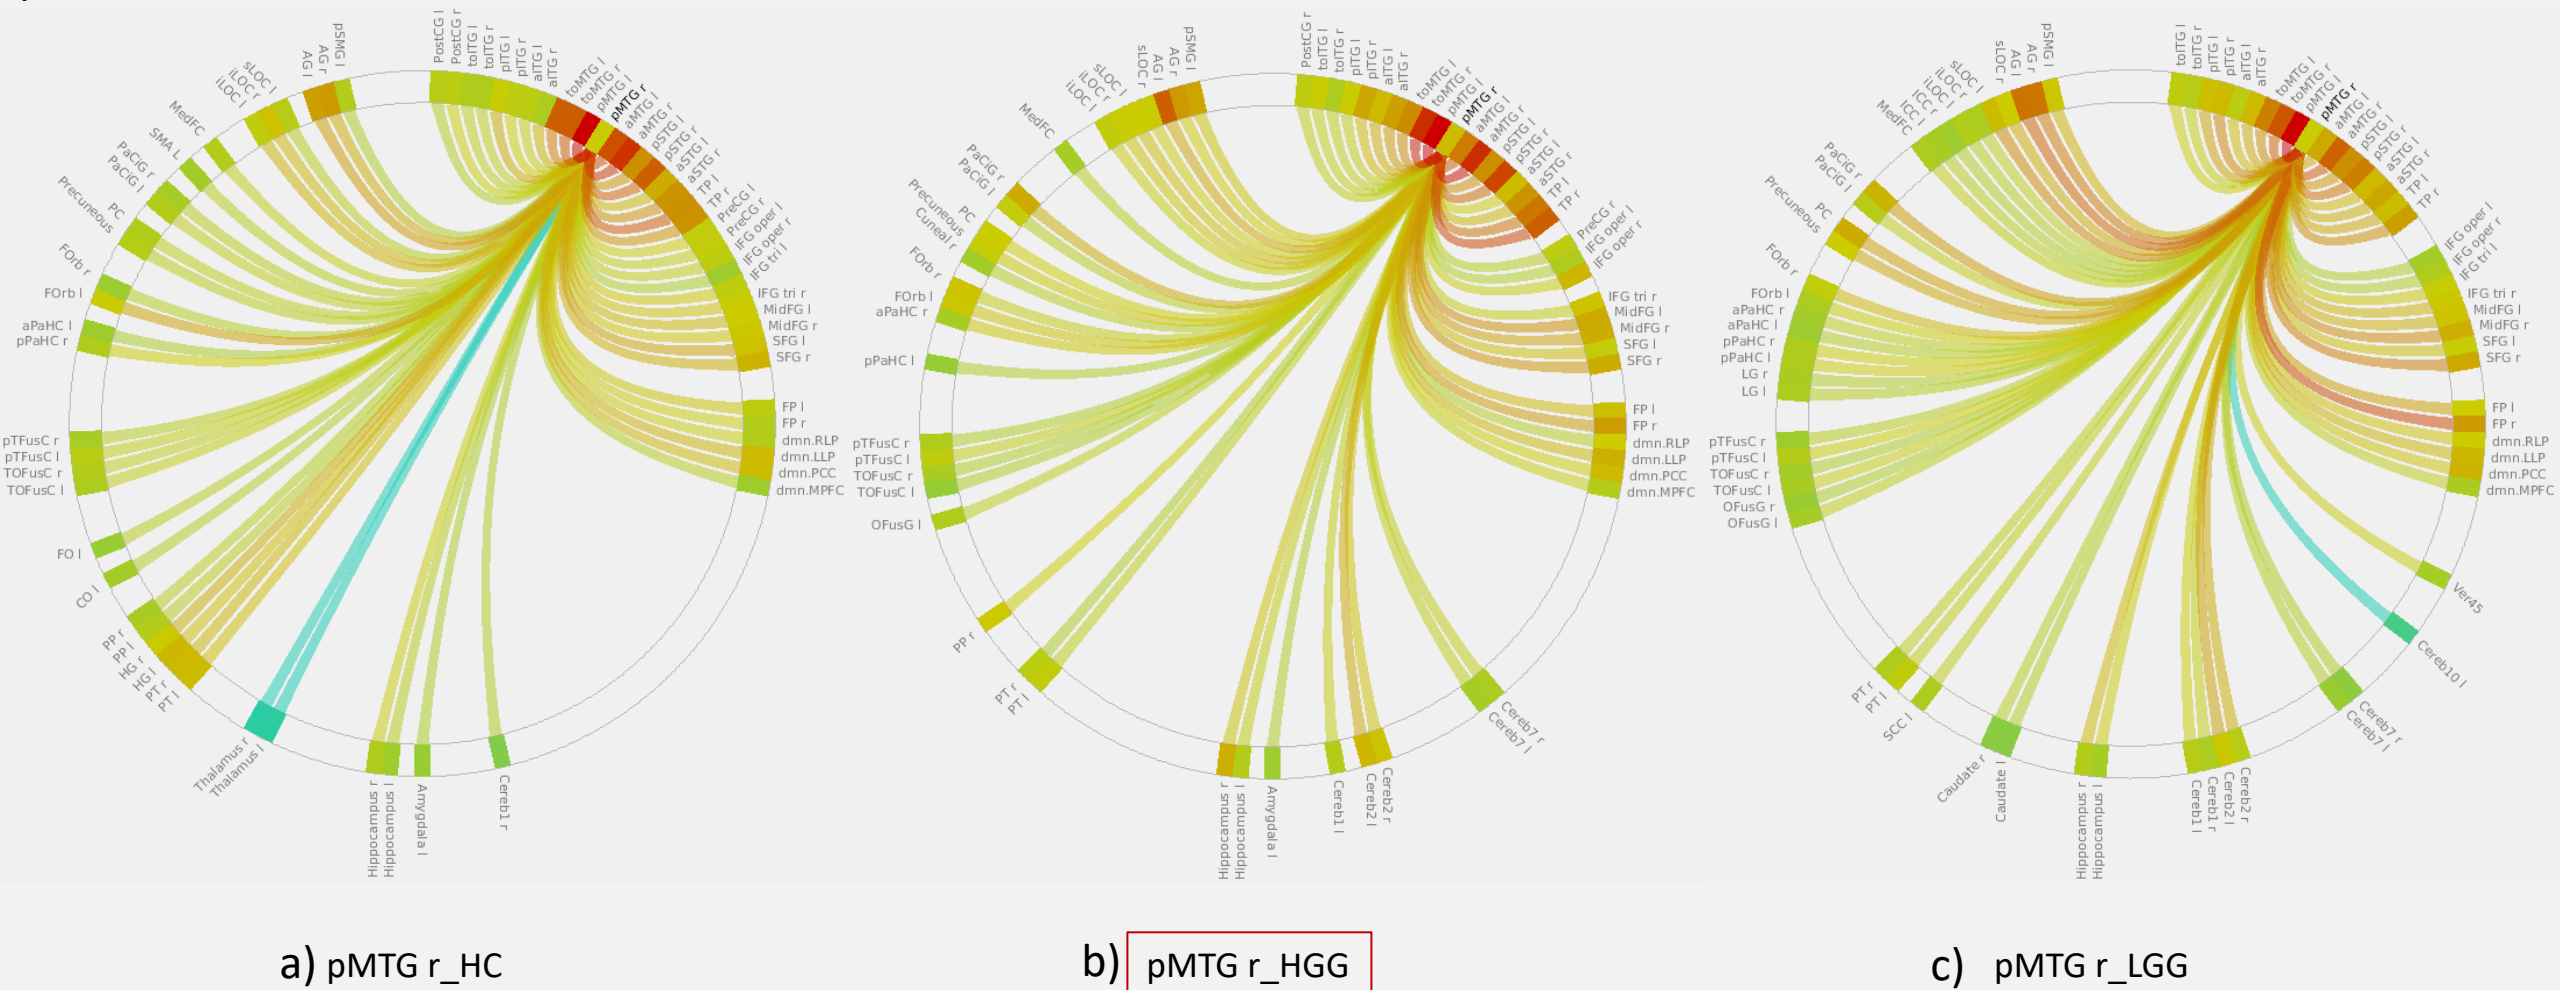

Whole-brain connectivity diagrams generated by seeding the posterior division of the right middle temporal gyrus (pMTG r) in healthy controls (HC), left-hemispheric high-grade gliomas (HGG) and left-hemispheric low-grade gliomas (LGG). The red square in diagram b) indicates that there was a significant difference in functional connectivity in this seed for HGG compared to HC. The color scale of the links represents their statistical significance (p-value FDR corrected, only links with  $p < 0.05$  are included). Regions of interest (ROI) in the diagrams are labeled as per the AAL atlas (available in CONN toolbox at <https://web.conn-toolbox.org>)



**Figure S14.** Whole-brain connectivity diagrams of the left post-central gyrus

Higher p  Lower p

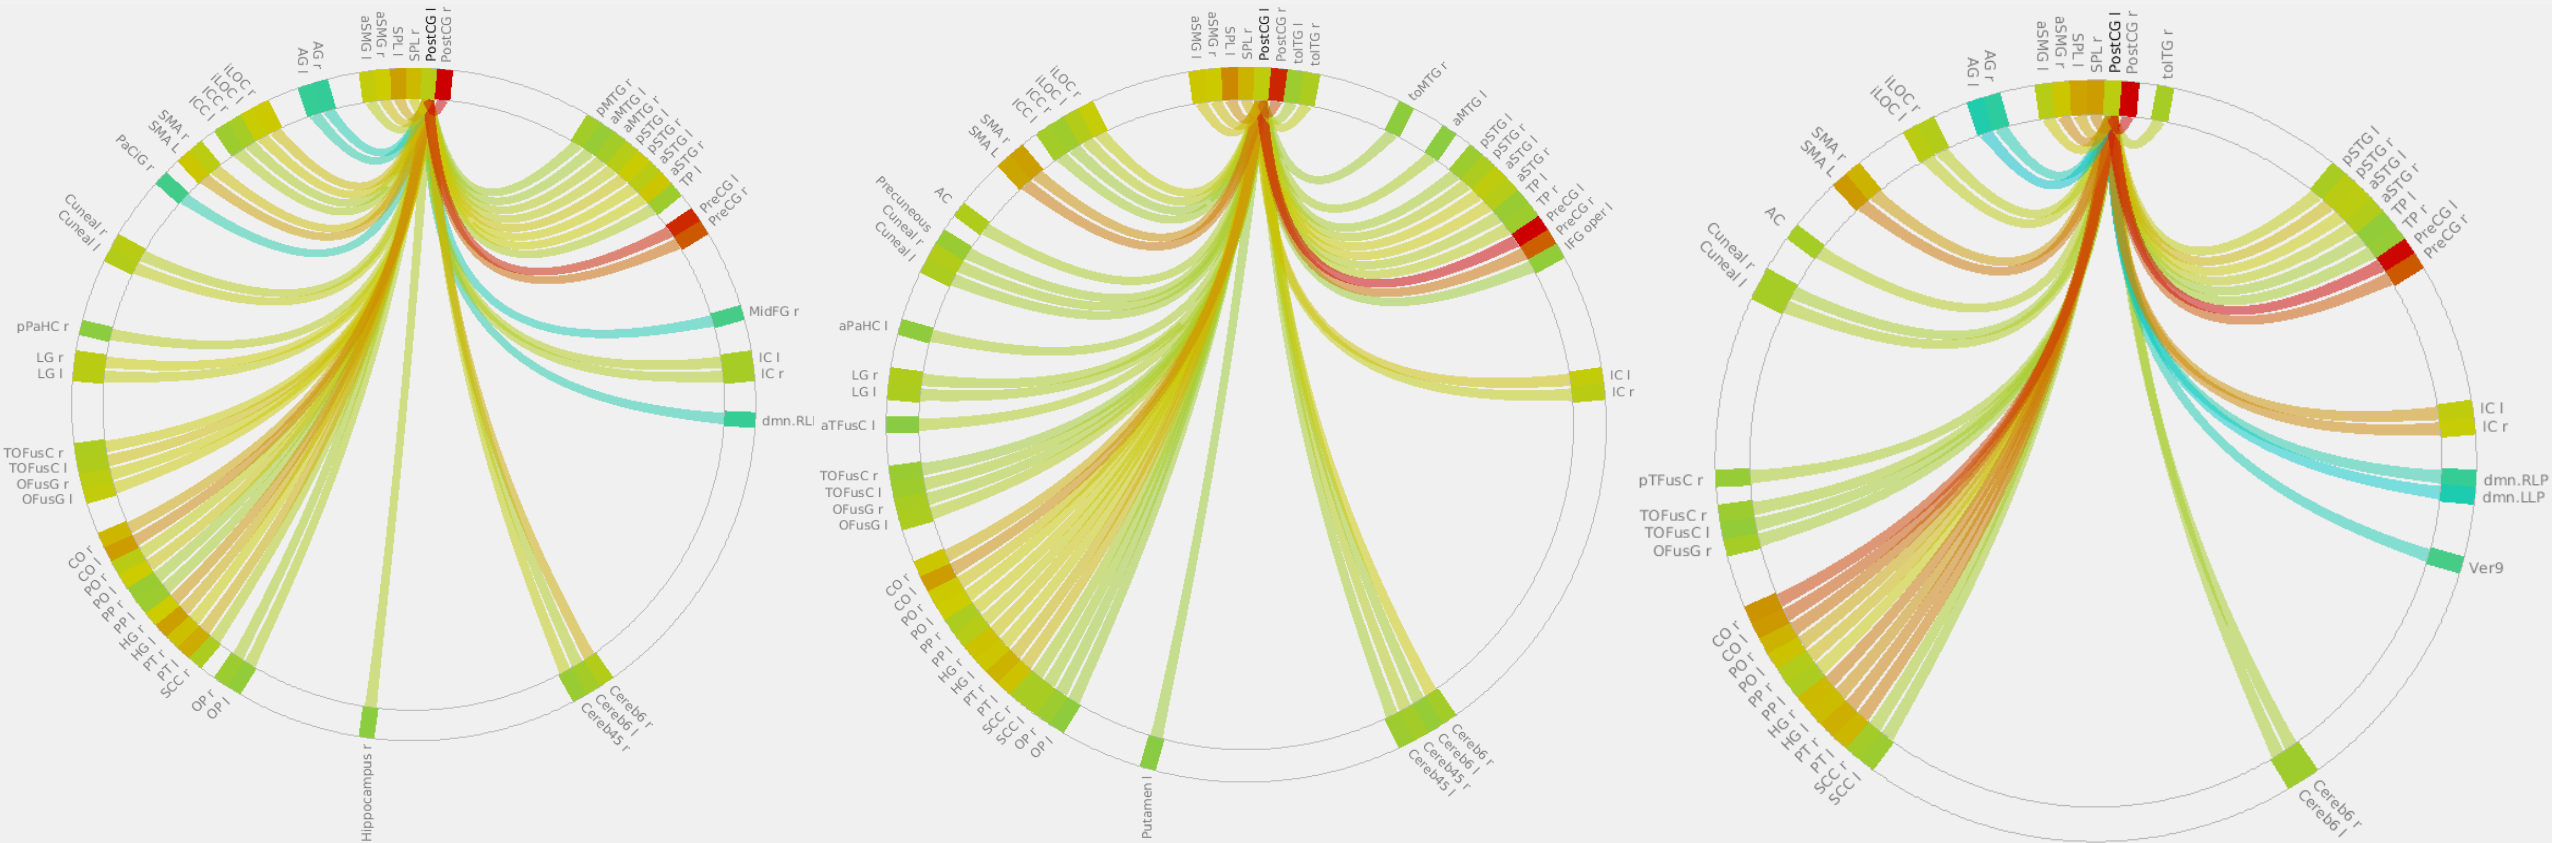

Whole-brain connectivity diagrams generated by seeding the left post-central gyrus (PostCG I) in healthy controls (HC), left-hemispheric high-grade gliomas (HGG) and left-hemispheric low-grade gliomas (LGG). The red square in diagram b) and c) indicates that there was a significant difference in functional connectivity in this seed for HGG and LGG compared to HC. The color scale of the links represents their statistical significance (p-value FDR corrected, only links with  $p < 0.05$  are included). Regions of interest (ROI) in the diagrams are labeled as per the AAL atlas (available in CONN toolbox at <https://web.conn-toolbox.org>)

**Figure S15.** Whole-brain connectivity diagrams of the left angular gyrus

Higher p  Lower p

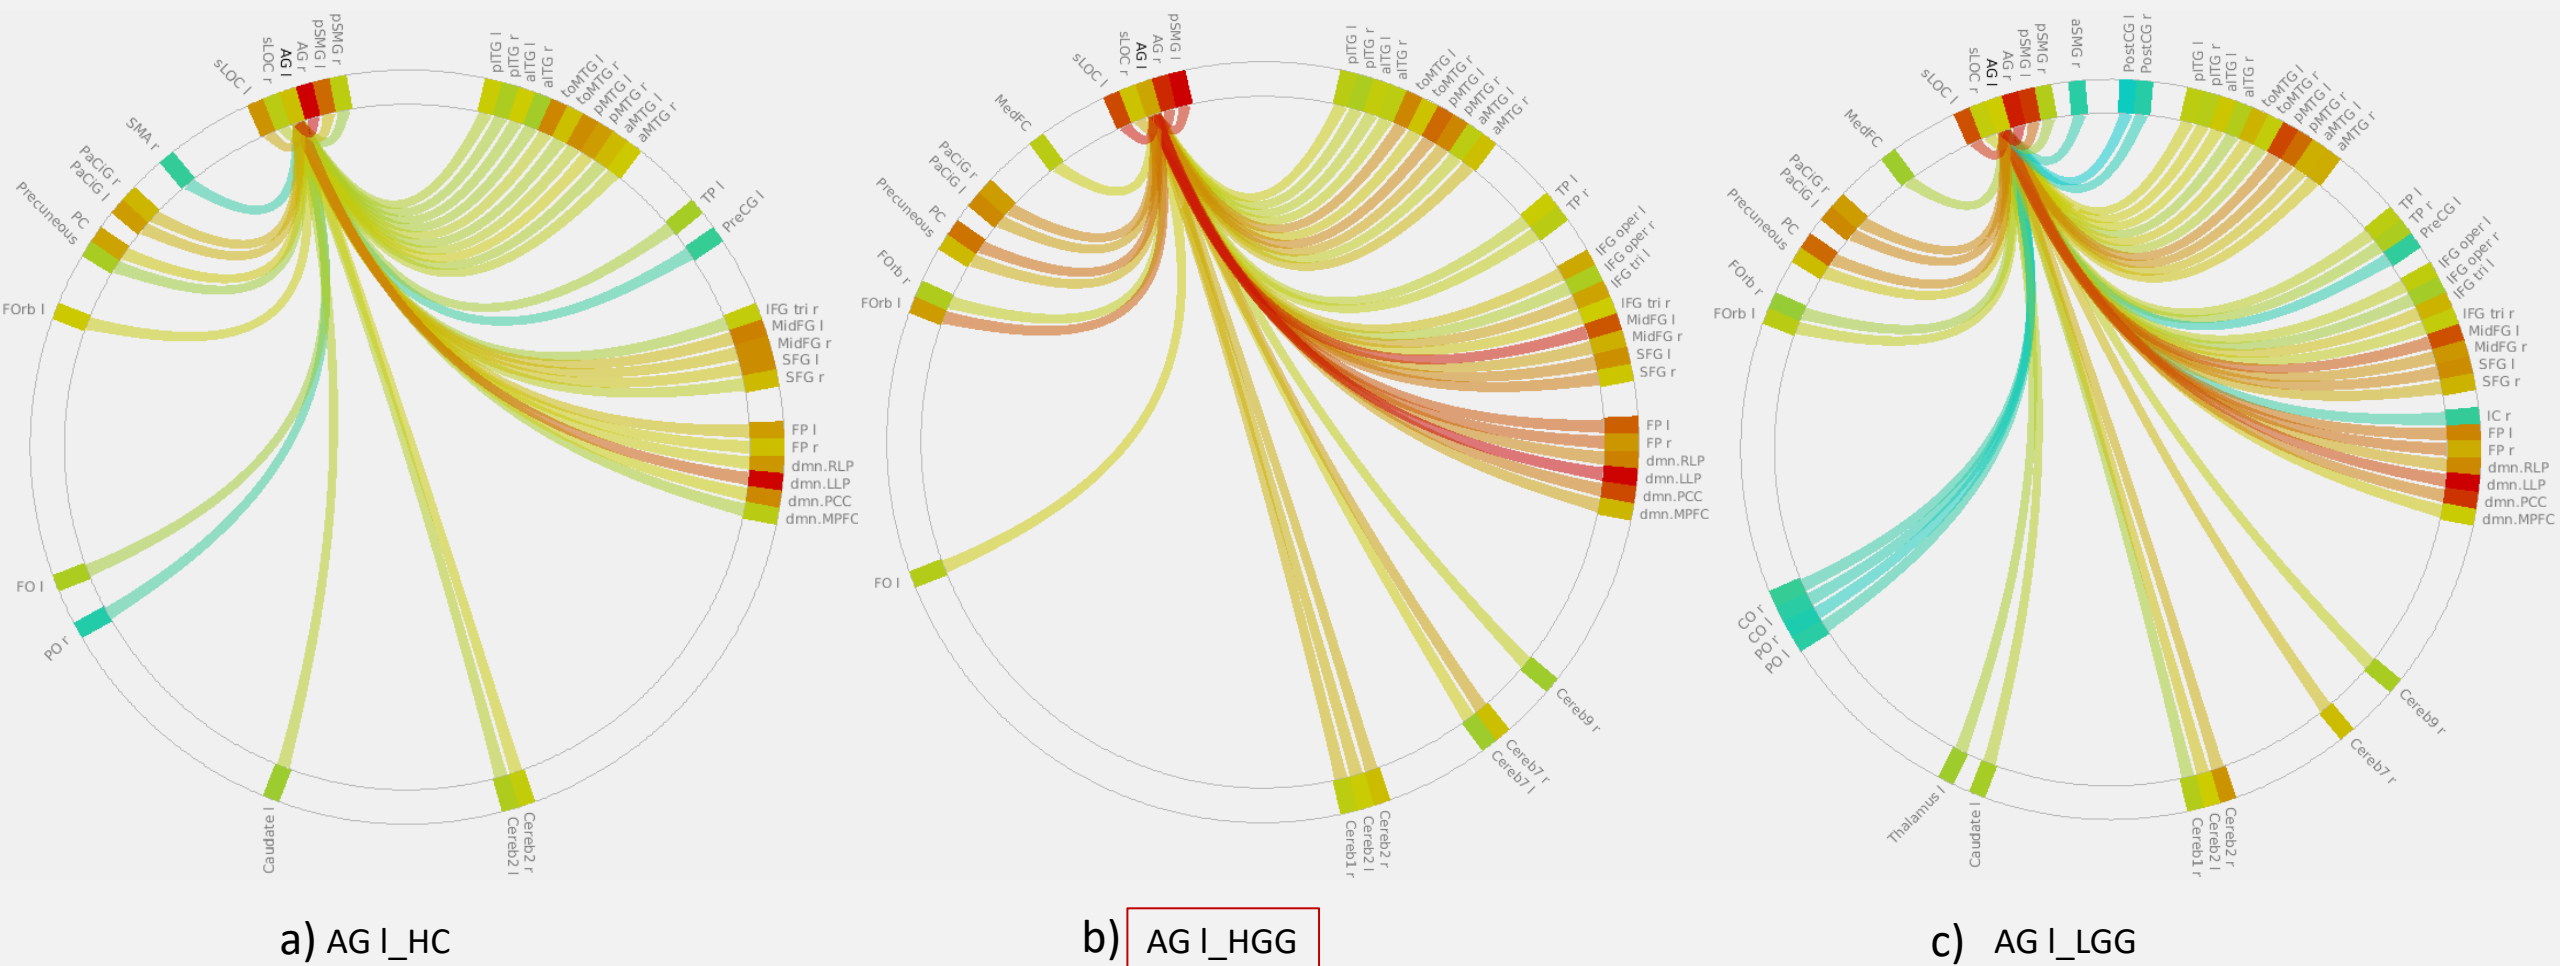

Whole-brain connectivity diagrams generated by seeding the left angular gyrus (AG I) in healthy controls (HC), left-hemispheric high-grade gliomas (HGG) and left-hemispheric low-grade gliomas (LGG). The red square in diagram b) indicates that there was a significant difference in functional connectivity in this seed for HGG compared to HC. The color scale of the links represents their statistical significance (p-value FDR corrected, only links with p<0.05 are included). Regions of interest (ROI) in the diagrams are labeled as per the AAL atlas (available in CONN toolbox at <https://web.conn-toolbox.org>)

**Figure S16.** Whole-brain connectivity diagrams of the left insular cortex

Higher p  Lower p

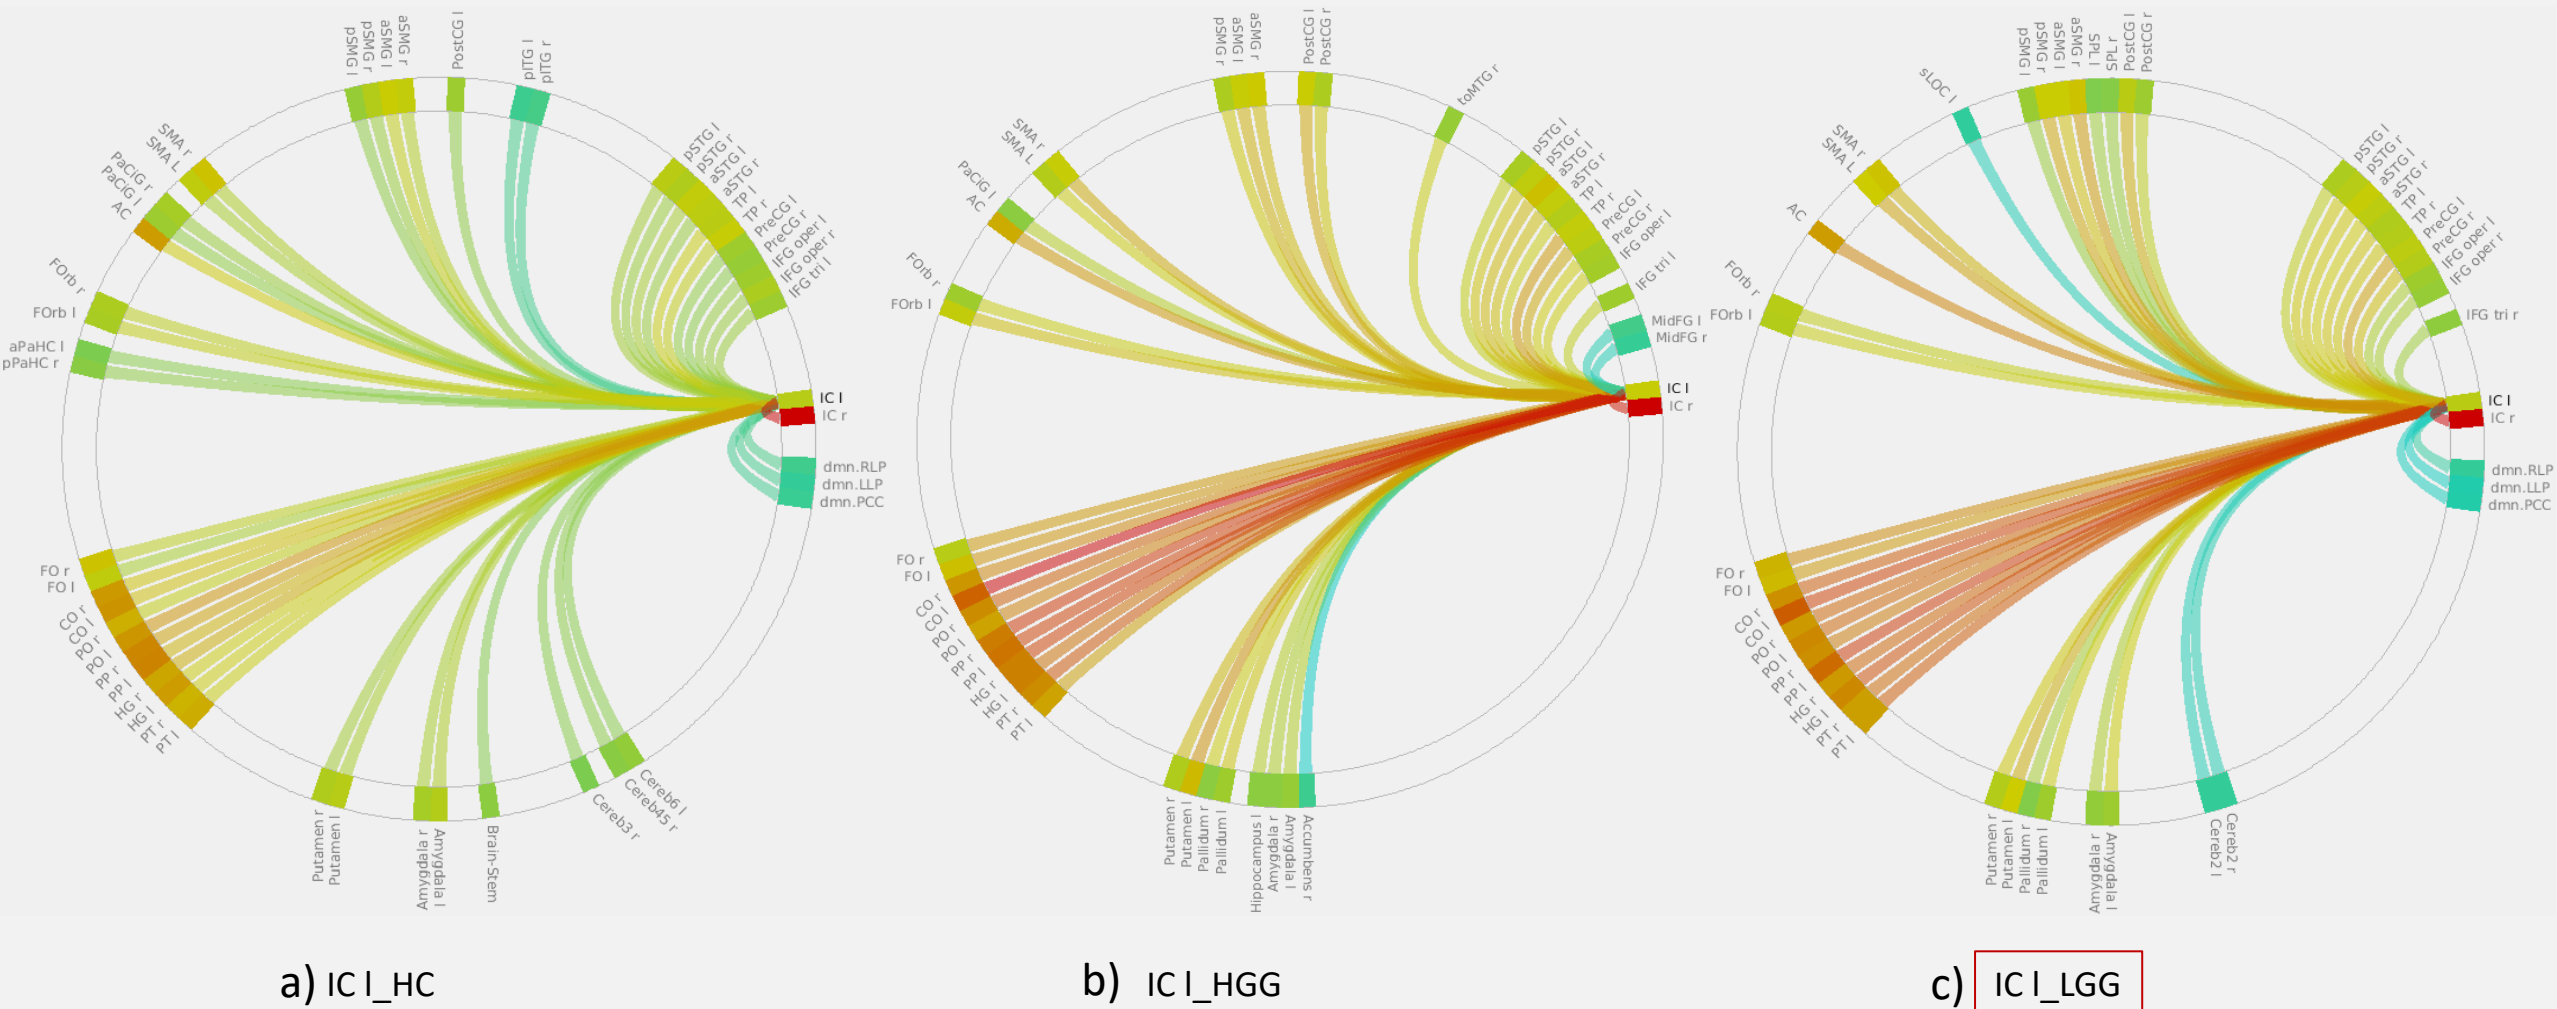

Whole-brain connectivity diagrams generated by seeding the left insular cortex (IC I) in healthy controls (HC), left-hemispheric high-grade gliomas (HGG) and left-hemispheric low-grade gliomas (LGG). The red square in diagram c) indicates that there was a significant difference in functional connectivity in this seed for LGG compared to HC. The color scale of the links represents their statistical significance (p-value FDR corrected, only links with p<0.05 are included). Regions of interest (ROI) in the diagrams are labeled as per the AAL atlas (available in CONN toolbox at <https://web.conn-toolbox.org>)

**Table S1.** Summary of graph-theoretical metrics investigated in this study (available at <https://web.conn-toolbox.org>)

| Degree                                                                                                                                                                                                                                                                                                                   | Cost                                                                                                                                                                                                                                                                                                                 | Average Path Length                                                                                                                                                                                                                                                                                | Clustering Coefficient                                                                                                                                                                                                                                                                                                                                                                                | Global Efficiency                                                                                                                                                                                                                                                                                                                                                                                                 | Local Efficiency                                                                                                                                                                                                                                                                                                                                                                        | Betweenness Centrality                                                                                                                                                                                                     |
|--------------------------------------------------------------------------------------------------------------------------------------------------------------------------------------------------------------------------------------------------------------------------------------------------------------------------|----------------------------------------------------------------------------------------------------------------------------------------------------------------------------------------------------------------------------------------------------------------------------------------------------------------------|----------------------------------------------------------------------------------------------------------------------------------------------------------------------------------------------------------------------------------------------------------------------------------------------------|-------------------------------------------------------------------------------------------------------------------------------------------------------------------------------------------------------------------------------------------------------------------------------------------------------------------------------------------------------------------------------------------------------|-------------------------------------------------------------------------------------------------------------------------------------------------------------------------------------------------------------------------------------------------------------------------------------------------------------------------------------------------------------------------------------------------------------------|-----------------------------------------------------------------------------------------------------------------------------------------------------------------------------------------------------------------------------------------------------------------------------------------------------------------------------------------------------------------------------------------|----------------------------------------------------------------------------------------------------------------------------------------------------------------------------------------------------------------------------|
| Degree is defined at each node as the number of edges from/to each node. Degree at each node/ROI represents a measure of network centrality, characterizing the degree of local connectedness of each ROI within a graph. Similarly, network degree represent the average or the degree across all nodes within a graph. | Cost is defined at each node as the proportion of edges from/to each node. Cost at each node/ROI represents a measure of network centrality, characterizing the degree of local connectedness of each ROI within a graph. Similarly, network cost represent the average or the cost across all nodes within a graph. | Path length between each pair of nodes in a graph is defined as the minimum number of edges traversed in an optimal path between them. Average path length represents a measure of node centrality within a network, characterizing the degree of global connectedness of each ROI within a graph. | Clustering Coefficient is defined as the proportion of connected edges in the local neighboring sub-graph for each node/ROI. Clustering coefficient represents a measure of local integration, characterizing the degree of inter-connectedness among all nodes within a node neighboring sub-graph. Similarly, network clustering coefficient represents a measure of network locality or coherence. | Global Efficiency at a node is defined as the average of inverse-distances between this node and all other nodes in the same graph. Global efficiency at a node represents a measure of this node centrality within the network, characterizing the degree of global connectedness of each ROI. Similarly, network global efficiency represents a measure of inter-connectedness or radius of the entire network. | Local Efficiency at each node is defined as the Global efficiency of the neighboring sub-graph of this node. Local efficiency represents a measure of local integration or coherence, characterizing the degree of inter-connectedness among all nodes within a node neighboring sub-graph. Similarly, network local efficiency represents a measure of local integration in a network. | Betweenness centrality represents an alternative measure of node centrality within a graph. It is defined as the proportion of times that a node is part of a shortest-path between any two pairs of nodes within a graph. |

**Table S2.** Clinical and demographic data for HGG patients

| GRADE | HAND | SEX | AGE | BNT | NEURO<br>LANGUAGE OE<br>preop | NEURO<br>LANGUAGE OE<br>postop |
|-------|------|-----|-----|-----|-------------------------------|--------------------------------|
| 4     | 1    | M   | 72  |     | 0                             |                                |
| 4     | 0    | F   | 79  | 24  | 1                             | 0                              |
| 4     | 1    | M   | 61  | 45  | 1                             | 0                              |
| 4     | 1    | M   | 68  |     | 0                             | 1                              |
| 4     | 1    | F   | 58  | 56  | 0                             | 0                              |
| 3     | 0    | M   | 24  | 48  | 1                             | 0                              |
| 4     | 1    | M   | 68  |     | 0                             | 0                              |
| 4     | 1    | M   | 66  |     | 1                             | 1                              |
| 4     | 1    | M   | 63  |     | 0                             | 0                              |
| 4     | 1    | M   | 58  |     | 0                             | 0                              |
| 3     | 1    | M   | 35  |     | 0                             | 0                              |
| 3     | 1    | M   | 38  |     | 0                             | 0                              |
| 4     | 1    | F   | 70  | 55  | 0                             | 0                              |
| 4     | 0    | M   | 54  | 60  | 0                             | 1                              |
| 4     | 1    | M   | 73  | 25  | 1                             | 1                              |
| 4     | 1    | F   | 65  | 53  | 0                             | 1                              |
| 4     | 1    | M   | 63  |     | 0                             | 1                              |
| 4     | 1    | M   | 64  |     | 1                             | 1                              |
| 4     | 1    | M   | 69  | 37  | 1                             | 1                              |
| 4     | 1    | M   | 62  | 54  | 1                             | 0                              |
| 3     | 1    | M   | 40  |     | 0                             | 0                              |
| 4     | 1    | M   | 71  |     | 0                             | 1                              |
| 4     | 1    | F   | 73  |     | 0                             | 0                              |
| 3     | 1    | M   | 77  | 57  | 0                             | 0                              |
| 4     | 1    | F   | 73  |     | 0                             | 1                              |
| 4     | 1    | M   | 65  |     | 1                             | 1                              |
| 4     | 1    | F   | 39  |     | 0                             | 0                              |
| 4     | 1    | M   | 50  |     | 0                             | 0                              |
| 4     | 1    | M   | 63  |     | 0                             | 0                              |
| 4     | 1    | F   | 88  |     | 1                             | 1                              |

HAND = handedness (0=left, 1=right); BNT = Boston Naming Test (60 elements); OE = objective examination (0=no aphasia, 1=aphasia)

**Table S3.** Clinical and demographic data for LGG patients

| GRADE | HAND | SEX | AGE | BNT | NEURO<br>LANGUAGE OE<br>preop | NEURO<br>LANGUAGE OE<br>postop |
|-------|------|-----|-----|-----|-------------------------------|--------------------------------|
| 2     | 1    | M   | 28  | 57  | 0                             | 0                              |
| 2     | 1    | M   | 50  |     | 0                             | 0                              |
| 2     | 0    | F   | 38  |     | 0                             | 1                              |
| 2     | 1    | M   | 45  | 54  | 0                             | 0                              |
| 2     | 1    | M   | 34  |     | 0                             | 0                              |
| 2     | 1    | M   | 40  |     | 0                             | 0                              |
| 2     | 1    | M   | 22  |     | 0                             | 0                              |
| 2     | 1    | F   | 66  |     | 0                             | 0                              |
| 2     | 1    | M   | 33  |     | 0                             | 0                              |
| 2     | 1    | M   | 46  |     | 0                             | 0                              |
| 2     | 1    | F   | 22  |     | 0                             | 0                              |
| 2     | 1    | M   | 31  |     | 0                             | 0                              |
| 2     | 1    | F   | 39  |     | 0                             | 0                              |
| 2     | 1    | M   | 28  | 57  | 0                             | 1                              |
| 2     | 1    | M   | 28  |     | 0                             | 0                              |
| 2     | 1    | M   | 46  |     | 0                             | 0                              |
| 2     | 1    | F   | 38  |     | 0                             | 0                              |
| 2     | 1    | F   | 49  |     | 0                             | 0                              |
| 2     | 0    | M   | 60  |     | 0                             | 1                              |
| 2     | 0    | M   | 36  |     | 0                             | 0                              |
| 2     | 1    | F   | 33  | 57  | 0                             |                                |
| 2     | 1    | M   | 51  |     | 0                             |                                |
| 2     | 0    | F   | 50  | 59  | 0                             |                                |
| 2     | 1    | M   | 41  |     | 0                             | 0                              |
| 2     | 0    | M   | 64  | 57  | 0                             | 0                              |
| 2     | 1    | M   | 18  | 54  | 0                             | 1                              |
| 2     | 1    | M   | 32  | 51  | 0                             | 0                              |
| 2     | 0    | M   | 40  |     | 0                             | 0                              |
| 2     | 0    | M   | 25  |     | 0                             | 1                              |
| 2     | 1    | F   | 58  | 60  | 0                             | 1                              |

HAND = handedness (0=left, 1=right); BNT = Boston Naming Test (60 elements); OE = objective examination (0=no aphasia, 1=aphasia)



**Table S4.** Statistical description of tumor size and patients’ age

|                    | Tumor Size |       | Age   |       |
|--------------------|------------|-------|-------|-------|
|                    | LGG        | HGG   | LGG   | HGG   |
| Mean               | 13.05      | 8.38  | 39.70 | 61.63 |
| Median             | 12.01      | 6.58  | 38.50 | 64.50 |
| Mode               | 7.00       | 4.32  | 28.00 | 63.00 |
| 25%percentile      | 7.61       | 4.32  | 31.00 | 58.00 |
| 75%percentile      | 16.57      | 11.56 | 48.00 | 71.00 |
| Standard Deviation | 7.08       | 5.94  | 12.55 | 14.33 |

Tumor size = cm<sup>2</sup>; Patients’ age = years

**Table S5.** Whole brain network mean values of graph-theory results

|     | Global<br>Efficiency | Local<br>Efficiency | Betweenness<br>Centrality | Cost     | AveragePath<br>Length | Clustering<br>Coefficient | Degree   |
|-----|----------------------|---------------------|---------------------------|----------|-----------------------|---------------------------|----------|
| HC  | 0.485714             | 0.718755            | 0.010047                  | 0.139641 | 2.368438              | 0.515864                  | 18.85147 |
| HGG | 0.490513             | 0.708368            | 0.009726                  | 0.14061  | 2.326033              | 0.503357                  | 18.98235 |
| LGG | 0.491249             | 0.715634            | 0.009796                  | 0.140356 | 2.328269              | 0.510522                  | 18.94804 |

**Table S6.** Left hemispheric network mean values of graph-theory results

|     | Global Efficiency | Local Efficiency | Betweenness Centrality | Cost     | Average Path Length | Clustering Coefficient | Degree   |
|-----|-------------------|------------------|------------------------|----------|---------------------|------------------------|----------|
| HC  | 0.423239          | 0.682214         | 0.031559               | 0.144286 | 2.645243            | 0.544371               | 7.07     |
| HGG | 0.42729           | 0.663264         | 0.031445               | 0.14302  | 2.628351            | 0.526015               | 7.008    |
| LGG | 0.441973          | 0.667678         | 0.033641               | 0.142503 | 2.678038            | 0.524488               | 6.982667 |

**Table S7.** Right hemispheric network mean values of graph-theory results

|     | Global<br>Efficiency | Local<br>Efficiency | Betweenness<br>Centrality | Cost     | AveragePath<br>Length | Clustering<br>Coefficient | Degree   |
|-----|----------------------|---------------------|---------------------------|----------|-----------------------|---------------------------|----------|
| HC  | 0.431523             | 0.675539            | 0.032204                  | 0.147837 | 2.654064              | 0.541028                  | 7.244    |
| HGG | 0.413517             | 0.687953            | 0.029934                  | 0.142585 | 2.616491              | 0.555485                  | 6.986667 |
| LGG | 0.427586             | 0.696122            | 0.032457                  | 0.143837 | 2.678345              | 0.5555                    | 7.048    |

**Table S8.** Mean values of significant graph-theory results for gliomas involving the frontal lobe

| SFG r | Global<br>Efficiency | Local<br>Efficiency | Betweenness<br>Centrality | Cost     | AveragePath<br>Length | Clustering<br>Coefficient | Degree   |
|-------|----------------------|---------------------|---------------------------|----------|-----------------------|---------------------------|----------|
| HGG   | 0.477333             | 0.536602            | 0.010666                  | 0.139259 | 2.446312              | 0.326347                  | 18.8     |
| LGG   | 0.549605             | 0.713216            | 0.016961                  | 0.192098 | 2.071295              | 0.466454                  | 25.93333 |
| HC    | 0.495265             | 0.700928            | 0.010501                  | 0.142592 | 2.329970              | 0.483163                  | 19.25    |

SFG r = superior frontal gyrus right

**Table S9.** Mean values of significant graph-theory results for gliomas involving the frontal lobe

|     | <b>SFG I</b>          | <b>MidFG I</b>            | <b>IFG tri I</b>          | <b>IFG tri I</b>          |
|-----|-----------------------|---------------------------|---------------------------|---------------------------|
|     | AveragePath<br>Length | Clustering<br>Coefficient | Betweenness<br>Centrality | Clustering<br>Coefficient |
| HGG | 2.442470              | 0.482575                  | 0.018026                  | 0.373210                  |
| LGG | 2.173093              | 0.495546                  | 0.007203                  | 0.483435                  |
| HC  | 2.327395              | 0.428003                  | 0.007744                  | 0.514210                  |

MidFG I = middle frontal gyrus left; SFG I = superior frontal gyrus left; IFG tri I = triangular part of the left inferior frontal gyrus



**Table S10.** Mean values of significant graph-theory results for gliomas involving the temporal lobe

|     | aSTG l               | aSTG l   | aSTG l | pSTG l               | pSTG l              | pSTG l   | pSTG l                    | pSTG l |
|-----|----------------------|----------|--------|----------------------|---------------------|----------|---------------------------|--------|
|     | Global<br>Efficiency | Cost     | Degree | Global<br>Efficiency | Local<br>Efficiency | Cost     | Clustering<br>Coefficient | Degree |
| HGG | 0.385247             | 0.137755 | 6.75   | 0.478742             | 0.670184            | 0.123148 | 0.429484                  | 16.62  |
| LGG | 0.479465             | 0.121605 | 16.41  | 0.488796             | 0.664110            | 0.119135 | 0.457369                  | 16.08  |
| HC  | 0.540463             | 0.198889 | 26.85  | 0.531987             | 0.788925            | 0.202962 | 0.583620                  | 27.4   |

aSTG l = superior temporal gyrus anterior division left; pSTG l = superior temporal gyrus posterior division left

**Table S11.** Mean values of significant graph-theory results for gliomas involving the temporal lobe

|     | aMTG I                    | aMTG I   | aMTG I | aITG I   | aITG I    |
|-----|---------------------------|----------|--------|----------|-----------|
|     | Betweenness<br>Centrality | Cost     | Degree | Cost     | Degree    |
| HGG | 0.025105                  | 0.105867 | 5.1875 | 0.130101 | 6.375     |
| LGG | 0.004922                  | 0.094444 | 12.75  | 0.087654 | 11.833333 |
| HC  | 0.011448                  | 0.171481 | 23.15  | 0.124074 | 16.75     |

aITG I = inferior temporal gyrus anterior division left; aMTG I = middle temporal gyrus anterior division left

**Table S12.** Mean values of significant graph-theory results for gliomas involving the temporal lobe

|     | pSTG r                 | pMTG r           | pMTG r   | pMTG r    | toMTG r  | toMTG r  | aITG r                 |
|-----|------------------------|------------------|----------|-----------|----------|----------|------------------------|
|     | Betweenness Centrality | Local Efficiency | Cost     | Degree    | Cost     | Degree   | Clustering Coefficient |
| HGG | 0.007628               | 0.69154          | 0.163425 | 22.0625   | 0.15     | 20.25    | 0.49059                |
| LGG | 0.039555               | 0.651497         | 0.212345 | 28.666666 | 0.166666 | 8.166666 | 0.407299               |
| HC  | 0.013726               | 0.739019         | 0.211851 | 28.6      | 0.205185 | 27.7     | 0.569916               |

pSTG r = superior temporal gyrus posterior division right; pMTG r = middle temporal gyrus posterior division right; toMTG r = middle temporal gyrus temporo-occipital division right; aITG r = inferior temporal gyrus anterior division right

**Table S13.** Mean values of significant graph-theory results for parietal gliomas

|     | PostCG I        | PostCG I                  | AG I             | AG I              |
|-----|-----------------|---------------------------|------------------|-------------------|
|     | LocalEfficiency | BetweennessC<br>entrality | GlobalEfficiency | AveragePathLength |
| HGG | 0.703477        | 0.013985                  | 0.538877         | 2.143081          |
| LGG | 0.712518        | 0.013083                  | 0.495918         | 2.415228          |
| HC  | 0.793269        | 0.00625                   | 0.495160         | 2.341090          |

AG I = angular gyrus left; AV = average; HC = healthy controls; HGG = high-grade glioma; LGG = low-grade glioma; PostCG\_I = post-central gyrus left

**Table S14.** Mean values of significant graph-theory results for insular gliomas

|     | IC I     | IC I      |
|-----|----------|-----------|
|     | Cost     | Degree    |
| HGG | 0.142857 | 7         |
| LGG | 0.156173 | 21.083333 |
| HC  | 0.208889 | 28.2      |

IC I = insular cortex left
